1 **BED-domain containing immune receptors confer**  
2 **diverse resistance spectra to yellow rust**

3

4 Clemence Marchal<sup>1\*</sup>, Jianping Zhang<sup>2,3\*</sup>, Peng Zhang<sup>4</sup>, Paul Fenwick<sup>5</sup>, Burkhard  
5 Steuernagel<sup>1</sup>, Nikolai M. Adamski<sup>1</sup>, Lesley Boyd<sup>6</sup>, Robert McIntosh<sup>4</sup>, Brande B.H. Wulff<sup>1</sup>,  
6 Simon Berry<sup>5</sup>, Evans Lagudah<sup>2</sup>, Cristobal Uauy<sup>1, †</sup>

7

8

9 <sup>1</sup> John Innes Centre, Norwich Research Park, Norwich NR4 7UH, United Kingdom

10 <sup>2</sup> Commonwealth Scientific and Industrial Research Organization (CSIRO) Agriculture &  
11 Food, Canberra, ACT 2601, Australia

12 <sup>3</sup> Henan Tianmin Seed Company Limited, Lankao County, 475300, Henan Province, China

13 <sup>4</sup> University of Sydney, Plant Breeding Institute, Cobbitty, NSW 2570, Australia

14 <sup>5</sup> Limagrain UK Ltd, Rothwell, Market Rasen, Lincolnshire, LN7 6DT, United Kingdom

15 <sup>6</sup> NIAB, Huntingdon Road, Cambridge, CB3 0LE, United Kingdom

16

17 \*Clemence Marchal and Jianping Zhang contributed equally to this work

18 † Correspondence to [cristobal.uauy@jic.ac.uk](mailto:cristobal.uauy@jic.ac.uk)

19

20

21 **Introductory paragraph**

22 Crop diseases reduce wheat yields by ~25% globally and thus pose a major threat to global  
23 food security<sup>1</sup>. Genetic resistance can reduce crop losses in the field and can be selected for  
24 through the use of molecular markers. However, genetic resistance often breaks down  
25 following changes in pathogen virulence, as experienced with the wheat yellow (stripe) rust  
26 fungus *Puccinia striiformis* f. sp. *tritici* (PST)<sup>2</sup>. This highlights the need to (i) identify genes  
27 that alone or in combination provide broad-spectrum resistance and (ii) increase our  
28 understanding of the underlying molecular mode of action. Here we report the isolation and  
29 characterisation of three major yellow rust resistance genes (*Yr7*, *Yr5*, and *YrSP*) from  
30 hexaploid wheat (*Triticum aestivum*), each having a distinct and unique recognition  
31 specificity. We show that *Yr5*, which remains effective to a broad range of PST isolates  
32 worldwide, is allelic to *YrSP* and paralogous to *Yr7*, both of which have been overcome by  
33 multiple PST isolates. All three *Yr* genes belong to a complex resistance gene cluster on  
34 chromosome 2B encoding nucleotide-binding and leucine-rich repeat proteins (NLRs) with a  
35 non-canonical N-terminal zinc-finger BED domain<sup>3</sup> that is distinct from those found in non-  
36 NLR wheat proteins. We developed and tested diagnostic markers to accelerate haplotype  
37 analysis and for marker-assisted selection to enable the stacking of the non-allelic *Yr* genes.  
38 Our results provide evidence that the BED-NLR gene architecture can provide effective field-  
39 based resistance to important fungal diseases such as wheat yellow rust.

40

41 **Main**

42 In plant immunity, NLRs act as intracellular immune receptors that upon pathogen  
43 recognition trigger a series of signalling steps that ultimately lead to cell death, thus  
44 preventing the spread of infection<sup>4,5</sup>. The NB-ARC domain is the hallmark of NLRs which in  
45 most cases include leucine-rich repeats (LRR) at the C-terminus. Recent *in silico* analyses

46 have identified NLRs with additional ‘integrated’ domains<sup>6-8</sup>, including zinc-finger BED  
47 domains (BED-NLRs). The function of the BED domains from BED-NLRs is unknown,  
48 although the BED domain from the non-NLR DAYSLEEPER protein was shown to bind  
49 DNA in Arabidopsis<sup>9</sup>. BED-NLRs are widespread across Angiosperm genomes and this gene  
50 architecture has been shown to confer resistance to bacterial blast in rice (*XaI*<sup>10,11</sup>).

51

52 The genetic relationship between *Yr5* and *Yr7* has been debated for almost 45 years<sup>12,13</sup>. Both  
53 genes map to chromosome arm 2BL in hexaploid wheat and were hypothesized to be  
54 allelic<sup>14</sup>, and closely linked with *YrSP*<sup>15</sup>. Whilst *Yr5* confers resistance to almost all tested  
55 PST isolates worldwide, both *Yr7* and *YrSP* have been overcome in the field, and each gene  
56 displays a distinct recognition specificity. Wide deployment of *Yr7* is correlated to the  
57 increase in the virulence for *Yr7* among PST isolates in the UK (Supplementary Table 1,  
58 Supplementary Figure 1).

59

60 To clone the genes encoding *Yr5*, *Yr7*, and *YrSP*, we identified susceptible ethyl  
61 methanesulfonate-derived (EMS) mutants from different genetic backgrounds carrying these  
62 genes (Figure 1, Supplementary Tables 2-3). We performed MutRenSeq<sup>16</sup> and isolated a  
63 single candidate contig for each of the three genes based on nine, ten, and four independent  
64 susceptible mutants, respectively (Figure 1a; Supplementary Figure 2). The three candidate  
65 contigs were genetically linked to a common mapping interval, previously identified for the  
66 three *Yr* loci<sup>15,17,18</sup>. Their closest homologs in the Chinese Spring wheat genome sequence  
67 (RefSeq v1.0, <https://wheat-urgi.versailles.inra.fr/Seq-Repository/Assemblies>) all lie within  
68 this common genetic interval (Figure 1b; Supplementary Figure 3).

69

70 Within each contig we predicted a single open reading frame based on RNA-Seq data. All  
71 three predicted *Yr* genes displayed similar exon-intron structures (Figure 1a), although *YrSP*  
72 was truncated in exon 3 due to a single base deletion that resulted in a premature termination  
73 codon. The DNA sequences of *Yr7* and *Yr5* were 77.9% identical across the complete gene;  
74 whereas *YrSP* was a truncated version of *Yr5*, sharing 99.8% identity in the common  
75 sequence (Supplementary Files 1 and 2). This suggests that *Yr5* and *YrSP* are encoded by  
76 alleles of the same gene, but are paralogous to *Yr7*. The 23 mutations identified by  
77 MutRenSeq were confirmed by Sanger sequencing and all lead to either an amino acid  
78 substitution or a truncation allele (splice junction or termination codon) (Figure 1a;  
79 Supplementary Table 3). Taken together, the mutant and genetic analyses demonstrate that  
80 *Yr5* and *YrSP* are allelic, while *Yr7* is encoded by a related, yet distinct gene.

81

82 The *Yr7*, *Yr5*, and *YrSP* proteins contain a zinc-finger BED domain at the N-terminus,  
83 followed by the canonical NB-ARC domain. Only *Yr7* and *Yr5* proteins encode multiple  
84 LRR motifs at the C-terminus (Figure 2a; green bars), *YrSP* having lost most of the LRR  
85 region due to the presence of the premature termination codon in exon 3. *YrSP* still confers  
86 functional resistance to PST, although with a different recognition specificity to *Yr5*. *Yr7* and  
87 *Yr5*/*YrSP* are highly conserved in the N-terminus, with a single amino-acid change in the  
88 BED domain. This high degree of conservation is eroded downstream of the BED domain  
89 (Figure 2a). The BED domain is required for *Yr7*-mediated resistance, as a single amino acid  
90 change in mutant line Cad0903 led to a susceptible reaction (Figure 1a). However,  
91 recognition specificity is not solely governed by the BED domain, as the *Yr5* and *YrSP* alleles  
92 have identical BED domain sequences, yet confer resistance to different PST isolates.

93

94 We examined the allelic variation in *Yr7* and *Yr5/YrSP* across eight sequenced tetraploid and  
95 hexaploid wheat genomes (Supplementary Table 4). We identified *Yr7* only in Cadenza and  
96 Paragon, which are identical-by-descent in this interval (Supplementary File 3,  
97 Supplementary Table 5, and Supplementary Figure 4). Both cultivars are derived from the  
98 original source of *Yr7*, tetraploid durum wheat (*T. turgidum* ssp. *durum*) cultivar Iumillo and  
99 its hexaploid derivative Thatcher (Supplementary Figure 4). None of the three sequenced  
100 tetraploid accessions (Svevo, Kronos, Zavitan) carry *Yr7* (Supplementary Table 5).

101

102 For *Yr5/YrSP*, we identified three additional alleles in the sequenced hexaploid wheat  
103 cultivars (Figure 2b; Supplementary Table 6). Claire encodes a complete NLR with six  
104 amino-acid changes situated outside the three conserved domains (BED, NB-ARC, and  
105 LRRs) and six polymorphisms in the C-terminus compared to *Yr5*. Robigus, Paragon, and  
106 Cadenza also encode a full length NLR that shares common polymorphisms with Claire, in  
107 addition to 19 amino acid substitutions across the BED and NB-ARC domains. The C-  
108 terminus polymorphisms between *Yr5* and the other alleles were due to a 774 bp insertion in  
109 *Yr5*, close to the 3' end, which carries an alternate termination codon (Supplementary File 2).  
110 Tetraploid accessions Kronos and Svevo encode a fifth *Yr5/YrSP* allele with a truncation in  
111 the LRR region distinct from *YrSP*, in addition to multiple amino acid substitutions across  
112 the C-terminus (Supplementary Table 6). This truncated tetraploid allele is reminiscent of  
113 *YrSP* and is expressed in Kronos (see Methods). However, none of these varieties (Claire,  
114 Robigus, Paragon, Cadenza, Svevo, and Kronos) exhibit a *Yr5/YrSP* resistance response,  
115 suggesting that these amino acid changes and truncations may alter recognition specificity or  
116 protein function.

117

118 We designed diagnostic markers for *Yr5*, *YrSP*, and *Yr7* to facilitate their detection and use in  
119 breeding. We confirmed their presence in the donor cultivars Thatcher and Lee (*Yr7*),  
120 Spaldings Prolific (*YrSP*), and spelt wheat cv. album (*Yr5*) (Supplementary Tables 7-8;  
121 Supplementary Figures 4-5). To further define their specificity, we tested the markers in a  
122 collection of global landraces<sup>19</sup> and European varieties<sup>20</sup> released over the past one hundred  
123 years. *Yr5* was only present in spelt cv. album, AvocetS-*Yr5*, and Lemhi-*Yr5* and was not  
124 detected in any other line (Supplementary Table 9) consistent with the fact that *Yr5* has not  
125 yet been deployed within European breeding programmes. *YrSP* was absent from the tested  
126 germplasm, except for AvocetS-*YrSP* (Supplementary Table 8). *Yr7* on the otherhand was  
127 more prevalent in the germplasm tested and we could track its presence across pedigrees,  
128 including Cadenza derived cultivars (Supplementary Tables 7-8; Supplementary Figure 4).

129

130 We defined the *Yr7/Yr5/YrSP* syntenic interval across the wheat genomes and related grass  
131 species *Aegilops tauschii* (D genome progenitor), *Hordeum vulgare* (barley), *Brachypodium*  
132 *distachyon*, and *Oryza sativa* (rice) (Supplementary file 4, Supplementary Figure 6). We  
133 identified both canonical NLRs, as well as BED-NLRs across all genomes and species,  
134 except for barley, which only contained canonical NLRs across the syntenic region. The  
135 phylogenetic relationship based on the NB-ARC domain suggests a common evolutionary  
136 origin of these integrated domain NLR proteins before the wheat-rice divergence (~50 Mya)  
137 and an expansion in the number of NLRs in the A and B genomes of polyploid wheat species  
138 (Figure 3a; Supplementary Figure 7). Within the interval we also identified several genes in  
139 the A, B, and D genomes that encode two consecutive in-frame BED domains (named BED\_I  
140 and BED\_II; Figure 3b-c, Supplementary Figure 6) followed by the canonical NLR. The  
141 BED domains in these genes were fully encoded within a single exon (exons 2 and 3) and in  
142 most cases had a four-exon structure (Figure 3c). This is consistent with the three-exon

143 structure of single BED domain genes, such as *Yr7* and *Yr5/YrSP* (BED\_I encoded on exon  
144 2). To our knowledge this is the first report of the double BED domain NLR protein  
145 structure. The biological function of this molecular innovation remains to be determined,  
146 although our data show that the single BED\_I structure can confer PST resistance and is  
147 required for *Yr7*-mediated resistance.

148

149 Among other mechanisms, integrated domains of NLRs are hypothesised to act as decoys for  
150 pathogen effector targets<sup>5</sup>. This would suggest that the integrated domain might be sequence-  
151 related to the host protein targeted by the effector. To identify these potential effector targets  
152 in the host, we retrieved all BED-domain proteins (108) from the hexaploid wheat genome,  
153 including 25 BED-NLRs, and additional BED-NLRs located in the syntenic intervals  
154 (Supplementary Table 10; Supplementary file 4). We also retrieved the rice *Xa1*<sup>10,11</sup> and  
155 ZBED proteins, the latter being hypothesized to mediate rice resistance to  
156 *Magnaporthe oryzae*<sup>7</sup>. We used the split network method implemented in SplitsTree4<sup>21</sup> to  
157 represent the relationships between these BED domains (Figure 3d; Supplementary Figure 8).  
158 We found a major split in the network with almost all wheat non-NLR BED proteins (76 of  
159 83; Figure 3d, black) clustering together, while the BED-NLRs proteins of wheat and other  
160 analysed species clustered opposite (Figure 3d). This separation is consistent with the  
161 hypothesis that integrated domains might have evolved to strengthen the interaction with the  
162 effector after integration<sup>22</sup>. Among BED-NLRs, BED\_I and BED\_II constitute two major  
163 clades, consistent with their relatively low amino acid conservation (Figure 3b), that are  
164 comprised solely of genes from within the *Yr7/Yr5/YrSP* syntenic region. Seven non-NLR  
165 BED domain wheat proteins clustered with BED-NLRs. These are most closely related to the  
166 *Brachypodium* and rice BED-NLR proteins and were not expressed in RNA-Seq data from a  
167 *Yr5* time-course (re-analysis of published data<sup>23</sup>; Supplementary Figure 9, Supplementary

168 Table 11). Similarly, no BED-containing protein was differentially expressed during this  
169 infection time-course, consistent with the prediction that effectors alter their targets' activity  
170 at the protein level in the integrated-decoy model<sup>5</sup>. We cannot however disprove that these  
171 closely related BED-containing proteins are involved in BED-NLR-mediated resistance.

172

173 BED-NLRs are frequent in Triticeae, and occur in other monocot<sup>8</sup> and dicot tribes<sup>7,24</sup>. Only a  
174 single BED-NLR gene, *Xal*, was previously shown to confer resistance to plant  
175 pathogens<sup>10,11</sup>. In the present study, we show that the distinct *Yr5*, *YrSP*, and *Yr7* resistance  
176 specificities belong to a complex NLR cluster on chromosome 2B and are encoded by two  
177 paralogous BED-NLRs genes. We report an allelic series for the *Yr5/YrSP* gene with five  
178 independent alleles, including three full-length BED-NLRs (including *Yr5*) and two truncated  
179 versions (including *YrSP*). This wider allelic series could be of functional significance as  
180 previously shown for the *Mla* and *Pm3* loci that confer resistance to *Blumeria graminis*<sup>25,26</sup> in  
181 barley and wheat, respectively, and the flax *L* locus conferring resistance to *Melampsora*  
182 *lini*<sup>27</sup>. Overall, our results add strong evidence for the importance of the BED-NLR  
183 architecture in plant-pathogen interactions. The paralogous and allelic relationship of these  
184 three distinct *Yr* loci will inform future hypothesis-driven engineering of novel recognition  
185 specificities.



186 **Methods**

187 **MutRenSeq**

188 *Mutant identification*

189 Supplementary Table 2 summarises plant materials and PST isolates used to identify mutants  
190 for each *Yr* gene. We used an EMS-mutagenised population in cultivar Cadenza<sup>28</sup> to identify  
191 mutants in *Yr7*; whereas EMS-populations in the corresponding AvocetS-*Yr* near isogenic  
192 line (NIL) were used to identify *Yr5* and *YrSP* mutants. For *Yr7*, we inoculated M<sub>3</sub> plants  
193 from the Cadenza EMS population with PST isolate 08/21 which is virulent to *Yr1*, *Yr2*, *Yr3*,  
194 *Yr4*, *Yr6*, *Yr9*, *Yr17*, *Yr27*, *Yr32*, *YrRob*, and *YrSol*<sup>29</sup>. We hypothesised that susceptible  
195 mutants would carry mutations in *Yr7*. Plants were grown in 192-well trays in a confined  
196 glasshouse with no supplementary lights or heat. Inoculations were performed at the one leaf  
197 stage (Zadoks 11) with a talc – urediniospore mixture. Trays were kept in darkness at 10 °C  
198 and 100% humidity for 24 hours. Infection types (IT) were recorded 21 days post-inoculation  
199 (dpi) following the Grassner and Straib scale<sup>30</sup>. Identified susceptible lines were progeny  
200 tested to confirm the reliability of the phenotype and DNA from M<sub>4</sub> plants was used for  
201 RenSeq (see section below). Similar methods were used for AvocetS-*Yr7*, AvocetS-*Yr5*, and  
202 AvocetS-*YrSP* EMS-mutagenised populations with the following exceptions: PST pathotypes  
203 108 E141 A+ (University of Sydney Plant Breeding Institute Culture no. 420), 150 E16 A+  
204 (Culture no. 598) and 134 E16 A+ (Culture no. 572) were used to evaluate *Yr7*, *Yr5*, and  
205 *YrSP* mutants, respectively. EMS-derived susceptible mutants in Lemhi-*Yr5* were previously  
206 identified<sup>31</sup> and DNA from M<sub>5</sub> plants was used for RenSeq.

207

208 *DNA preparation, resistance gene enrichment and sequencing (RenSeq)*

209 We extracted total genomic DNA from young leaf tissue using the large-scale DNA  
210 extraction protocol from the McCouch Lab ([https://ricelab.plbr.cornell.edu/dna\\_extraction](https://ricelab.plbr.cornell.edu/dna_extraction))

211 and a previously described method<sup>32</sup>. We checked DNA quality and quantity on a 0.8%  
212 agarose gel and with a NanoDrop spectrophotometer (Thermo Scientific). Arbor Biosciences  
213 (Ann Arbor, MI, USA) performed the targeted enrichment of NLRs according to the MYbaits  
214 protocol using an improved version of the previously published Triticeae bait library  
215 available at [github.com/steuernb/MutantHunter](https://github.com/steuernb/MutantHunter). Library construction was performed using  
216 the TruSeq RNA protocol v2 (Illumina 15026495). Libraries were pooled with one pool of  
217 samples for Cadenza mutants and one pool of eight samples for the Lemhi-*Yr5* parent and  
218 Lemhi-*Yr5* mutants. AvocetS-*Yr5* and AvocetS-*YrSP* wild-type, together with their respective  
219 mutants, were also processed according to the MYbaits protocol and the same bait library  
220 was used. All enriched libraries were sequenced on a HiSeq 2500 (Illumina) in High Output  
221 mode using 250 bp paired end reads and SBS chemistry. For the Cadenza wild-type, we  
222 generated data on an Illumina MiSeq instrument. In addition to the mutants, we also  
223 generated RenSeq data for Kronos and Paragon to assess the presence of *Yr5* in Kronos and  
224 *Yr7* in Paragon. Details of all the lines sequenced, alongside NCBI accession numbers, are  
225 presented in Supplementary Tables 3 and 12.

226

### 227 **MutantHunter pipeline**

228 We adapted the pipeline from <https://github.com/steuernb/MutantHunter/> to identify  
229 candidate contigs for the targeted *Yr* genes. First, we trimmed the RenSeq-derived reads with  
230 trimmomatic<sup>33</sup> using the following parameters: ILLUMINACLIP:TruSeq2-PE.fa:2:30:10  
231 LEADING:30 TRAILING:30 SLIDINGWINDOW:10:20 MINLEN:50 (v0.33). We made *de*  
232 *novo* assemblies of wild-type plant trimmed reads with the CLC assembly cell and default  
233 parameters apart from the word size (-w) parameter that we set to 64 (v5.0,  
234 <http://www.clcbio.com/products/clc-assembly-cell/>) (Supplementary Table 13). We then  
235 followed the MutantHunter pipeline detailed at <https://github.com/steuernb/MutantHunter/>.

236 For Cadenza mutants, we used the following MutantHunter program parameters to identify  
237 candidate contigs: -c 20 -n 6 -z 1000. These options require a minimum coverage of 20x for  
238 SNPs to be called; at least six susceptible mutants must have a mutation in the same contig to  
239 report it as candidate; small deletions were filtered out by setting the number of coherent  
240 positions with zero coverage to call a deletion mutant at 1000. The -n parameter was  
241 modified accordingly in subsequent runs with the Lemhi-*Yr5* datasets (-n 6).

242

243 To identify *Yr5* and *YrSP* contigs from Avocet mutants, we followed the MutantHunter  
244 pipeline with all default parameters, except in the use of CLC Genomics Workbench (v10)  
245 for reads QC, trimming, *de novo* assembly of Avocet wild-type and mapping all the reads  
246 against *de novo* wild-type assembly. The default MutantHunter parameters were used except  
247 that -z was set as 100. The parameter -n was set to 2 in the first run and then to 3 in the  
248 second run. Two *Yr5* mutants were most likely sibling lines as they carried identical  
249 mutations at the same position (Supplementary Figure 2, Supplementary Table 3).

250

251 For *Yr7* we identified a single contig with six mutations, however we did not identify  
252 mutations in line Cad0903. Upon examination of the *Yr7* candidate contig we predicted that  
253 the 5' region was likely to be missing (Supplementary Figure 2). We thus annotated potential  
254 NLRs in the Cadenza genome assembly available from the Earlham Institute (Supplementary  
255 Table 4, [http://opendata.earlham.ac.uk/Triticum\\_aestivum/EI/v1.1](http://opendata.earlham.ac.uk/Triticum_aestivum/EI/v1.1)) with the NLR-Annotator  
256 program using default parameters (<https://github.com/steuernb/NLR-Annotator>). We  
257 identified an annotated NLR in the Cadenza genome with 100% sequence identity to the *Yr7*  
258 candidate contig, which extended beyond our *de novo* assembled sequence. We therefore  
259 replaced the previous candidate contig with the extended Cadenza sequence (100% sequence  
260 identity) and mapped the RenSeq reads from Cadenza wild-type and mutants as described

261 above. This confirmed the candidate contig for *Yr7* as we retrieved the missing 5' region  
262 including the BED domain. The improved contig now also contained a mutation in the  
263 outstanding mutant line Cad0903 (Supplementary Figure 2). The Triticeae bait library does  
264 not include integrated domains in its design so they are prone to be missed, especially when  
265 located at the ends of an NLR. Sequencing technology could also have accounted for this:  
266 MiSeq was used for Cadenza wild-type whereas HiSeq was chosen for Lemhi-*Yr5* and we  
267 recovered the 5' region in the latter, although coverage was lower than for the regions  
268 encoding canonical domains. In summary, we sequenced nine, ten, and four mutants for *Yr7*,  
269 *Yr5*, and *YrSP*, respectively and identified for each target gene a single contig that accounted  
270 for all mutants.

271

#### 272 **Candidate contig confirmation and gene annotation**

273 We sequenced the *Yr5*, *Yr7*, and *YrSP* candidate contigs from the mutant lines (annotated in  
274 Supplementary Files 1 and 2) to confirm the EMS-derived mutations using primers  
275 documented in Supplementary Table 14. We first PCR-amplified the complete locus from the  
276 same DNA preparations as the ones submitted for RenSeq with the Phusion® High-Fidelity  
277 DNA Polymerase (New England Biolabs) following the suppliers protocol  
278 (<https://www.neb.com/protocols/0001/01/01/pcr-protocol-m0530>). We then carried out  
279 nested PCR on the obtained product to generate overlapping 600-1,000 bp amplicons that  
280 were purified using the MiniElute kit (Qiagen). The purified PCR products were sequenced  
281 by GATC following the LightRun protocol ([https://www.gatc-biotech.com/shop/en/lightrun-](https://www.gatc-biotech.com/shop/en/lightrun-tube-barcode.html)  
282 [tube-barcode.html](https://www.gatc-biotech.com/shop/en/lightrun-tube-barcode.html)). Resulting sequences were aligned to the wild-type contig using  
283 ClustalOmega (<https://www.ebi.ac.uk/Tools/msa/clustalo/>). This allowed us to curate the *Yr7*  
284 locus in the Cadenza assembly that contained two sets of unknown ('N') bases in its

285 sequence, corresponding to a 39 bp insertion and a 129 bp deletion (Supplementary File 3),  
286 and to confirm the presence of the mutations in each mutant line.

287 We used HISAT2<sup>34</sup> (v2.1) to map RNA-Seq reads available from Cadenza and AvocetS-  
288 *Yr5*<sup>23</sup> to the RenSeq *de novo* assemblies with curated loci to define the structure of the genes.  
289 We used the following parameters: --no-mixed --no-discordant to map reads in pairs only.  
290 We used the --novel-splicesite-outfile to predict splicing sites that we manually scrutinised  
291 with the genome visualisation tool IGV<sup>35</sup> (v2.3.79). Predicted coding sequences (CDS) were  
292 translated using the ExPASy online tool (<https://web.expasy.org/translate/>). This allowed us  
293 to predict the effect of the mutations on each candidate transcript (Figure 1a; Supplementary  
294 Table 3). The long-range primers for both *Yr7* and *Yr5* loci were then used on the  
295 corresponding susceptible Avocet NIL mutants to determine whether the genes were present  
296 and carried mutations in that background (Figure 1a; Supplementary Files 1 and 2).

297

## 298 **Genetic linkage**

299 We generated a set of F<sub>2</sub> populations to genetically map the candidate contigs  
300 (Supplementary Table 2). For *Yr7* we developed an F<sub>2</sub> population based on a cross between  
301 the susceptible mutant line Cad0127 to the Cadenza wild-type (population size 139  
302 individuals). For *Yr5* and *YrSP* we developed F<sub>2</sub> populations between AvocetS and the NILs  
303 carrying the corresponding *Yr* gene (94 individuals for *YrSP* and 376 for *Yr5*). We extracted  
304 DNA from leaf tissue at the seedling stage (Zadoks 11) following a previously published  
305 protocol<sup>36</sup> and KASP assays were carried out as described in<sup>37</sup>. R/qtl package<sup>38</sup> was used to  
306 produce the genetic map based on a general likelihood ratio test and genetic distances were  
307 calculated from recombination frequencies (v1.41-6).

308

309 We used previously published markers linked to *Yr7*, *Yr5*, and *YrSP* (WMS526, WMS501  
310 and WMC175, WMC332, respectively<sup>15,17,18</sup>) in addition to closely linked markers WMS120,  
311 WMS191, and WMC360 (based on the GrainGenes database  
312 <https://wheat.pw.usda.gov/GG3/>) to define the physical region on the Chinese Spring  
313 assembly RefSeq v1.0 (<https://wheat-urgi.versailles.inra.fr/Seq-Repository/Assemblies>). Two  
314 different approaches were used for genetic mapping depending on the material. For *Yr7*, we  
315 used the public data<sup>28</sup> for Cad0127 ([www.wheat-tilling.com](http://www.wheat-tilling.com)) to identify nine mutations  
316 located within the *Yr7* physical interval based on BLAST analysis against RefSeq v1.0. We  
317 used KASP primers when available and manually designed additional ones including an  
318 assay targeting the Cad0127 mutation in the *Yr7* candidate contig (Supplementary Table 14).  
319 We genotyped the Cad0127 F<sub>2</sub> populations using these nine KASP assays and confirmed  
320 genetic linkage between the Cad0127 *Yr7* candidate mutation and the nine mutations across  
321 the physical interval (Supplementary Figure 3).

322

323 For *Yr5* and *YrSP*, we first aligned the candidate contigs to the best BLAST hit in an AvocetS  
324 RenSeq *de novo* assembly. We then designed KASP primers targeting polymorphisms  
325 between these sequences and used them to genotype the corresponding F<sub>2</sub> population  
326 (Supplementary Table 14). For both candidate contigs we confirmed genetic linkage with the  
327 previously published genetic intervals for these *Yr* genes (Supplementary Figure 3).

328

### 329 ***Yr7* gene-specific markers**

330 We aligned the *Yr7* sequence with the best BLAST hits in the genomes listed on  
331 Supplementary Table 4 and designed KASP primers targeting polymorphisms that were *Yr7*-  
332 specific. Three markers were retained after testing on a selected panel of Cadenza-derivatives  
333 and varieties that were positive for *Yr7* markers in the literature, including the *Yr7* reference

334 cultivar Lee (Supplementary Table 7, 8 and 15). The panel of Cadenza-derivatives was  
335 phenotyped with three PST isolates: PST 08/21 (*Yr7*-avirulent), PST 15/151 (*Yr7*-avirulent –  
336 virulent to *Yr1*, 2, 3, 4, 6, 9, 17, 25, 32, *Rendezvous*, *Sp*, *Robigus*, *Solstice*) and PST 14/106  
337 (*Yr7*-virulent, virulent to *Yr1*, 2, 3, 4, 6, 7, 9, 17, 25, 32, *Sp*, *Robigus*, *Solstice*, *Warrior*,  
338 *Ambition*, *Cadenza*, *KWS Sterling*, *Apache*) to determine whether *Yr7*-positive varieties, as  
339 identified by the three KASP markers, displayed a consistent specificity (Supplementary  
340 Table 7). Pathology assays were performed as for the screening of the Cadenza mutant  
341 population. We retrieved pedigree information for the analysed varieties from the Genetic  
342 Resources Information System for Wheat and Triticale database (GRIS,  
343 [www.wheatpedigree.net](http://www.wheatpedigree.net)) and used the Helium software<sup>39</sup> (v1.17) to illustrate the breeding  
344 history of *Yr7* in the UK (Supplementary Figure 4).

345

346 We used the three *Yr7* KASP markers to genotype (i) varieties from the AHDB Wheat  
347 Recommended List from 2005-2018 ([https://cereals.ahdb.org.uk/varieties/ahdb-](https://cereals.ahdb.org.uk/varieties/ahdb-recommended-lists.aspx)  
348 [recommended-lists.aspx](https://cereals.ahdb.org.uk/varieties/ahdb-recommended-lists.aspx)); (ii) the Gediflux collection of European bread wheat varieties  
349 released between 1920 and 2010<sup>20</sup> and (iii) the core Watkins collection, which represents a  
350 global set of wheat landraces collected in the 1930s<sup>19</sup>. KASP assays were carried out as in<sup>37</sup>  
351 and results are reported in Supplementary Table 8.

352

### 353 ***Yr5* and *YrSP* gene-specific markers**

354 We identified a 774 bp insertion in the *Yr5* allele 29 bp upstream of the STOP codon with  
355 respect to the Cadenza and Claire alleles. Genomic DNA from *YrSP* confirmed that the  
356 insertion was specific to *Yr5*. We used this polymorphism to design primers flanking the  
357 insertion and tested them on a subset of the collections mentioned above. We added 32 DNA  
358 sample from diverse accessions of *Triticum dicoccoides*, the wild progenitor of domesticated

359 wheat (passport data shown in Supplementary Table 16). We included DNA from *Triticum*  
360 *aestivum* ssp. *spelta* var. album<sup>31</sup> (*Yr5* donor) and Spaldings Prolific (*YrSP* donor) to assess  
361 their amplification profiles. PCR amplification was conducted using a touchdown  
362 programme: 10 cycles, -0.5 °C per cycle starting from 67 °C and the remaining 25 cycles at  
363 62 °C. This allowed us to increase the specificity of the reaction. We observed three different  
364 profiles on the tested varieties; (i) a 1,281 bp amplicon in *Yr5* positive cultivars, (ii) a 507 bp  
365 amplicon in the alternate *Yr5* allele carriers, including AvocetS-*YrSP*, Cadenza, and Claire,  
366 and (iii) no amplification in other varieties. We sequenced the different amplicons and  
367 confirmed the insertion in *Yr5* compared to the alternate alleles (Supplementary File 2). The  
368 lack of amplicons in some varieties most likely represents the absence of the loci in the  
369 tested varieties. For *YrSP*, we aligned the *YrSP* and *Yr5* sequences to design KASP primers  
370 targeting the G to C SNP between the two alleles (Supplementary File 2, Supplementary  
371 Table 15). We tested the marker by genotyping selected varieties as controls and varieties  
372 from the AHDB Wheat Recommended List from 2005-2018 (Supplementary Table 8).

373

#### 374 ***In silico* allele mining for *Yr7* and *Yr5***

375 We used the *Yr7* and *Yr5* sequences to retrieve the best BLAST hits in the *T. aestivum* and *T.*  
376 *turgdium* wheat genomes listed in Supplementary Table 4. The best *Yr5* hits shared between  
377 93.6 and 99.3% sequence identity, which was comparable to what was observed for alleles  
378 derived from the wheat *Pm3* (>97% identity)<sup>26</sup> and flax *L* (>90% identity)<sup>27</sup> genes. *Yr7* was  
379 identified only in Paragon and Cadenza (Supplementary Table 5; See Supplementary File 3  
380 for curation of the Paragon sequence).

381

#### 382 **Analysis of the *Yr7* and *Yr5/YrSP* cluster on RefSeq v1.0**

383 *Definition of syntenic regions across grass genomes*



384 We used NLR-Annotator to identify putative NLR loci on RefSeq v1.0 chromosome 2B and  
385 identified the best BLAST hits to *Yr7* and *Yr5* on RefSeq v1.0. Additional BED-NLRs and  
386 canonical NLRs were annotated in close physical proximity to these best BLAST hits.  
387 Therefore, to better define the NLR cluster we selected ten non-NLR genes located both  
388 distal and proximal to the region, and identified orthologs in barley, *Brachypodium*, and rice  
389 in *EnsemblPlants* (<https://plants.ensembl.org/>). We used different % ID cutoffs for each  
390 species (>92% for barley, >84% for *Brachypodium*, and >76% for rice) and determined the  
391 syntenic region when at least three consecutive orthologues were found. A similar approach  
392 was conducted for *Triticum* ssp and *Ae. tauschii* (Supplementary file 4).

393

#### 394 *Definition of the NLR content of the syntenic region*

395 We extracted the previously defined syntenic region from the grass genomes listed in  
396 Supplementary Table 4 and annotated NLR loci with NLR-Annotator. We maintained  
397 previously defined gene models where possible, but also defined new gene models that were  
398 further analysed through a BLASTx analysis to confirm the NLR domains (Supplementary  
399 Files 4 and 5). The presence of BED domains in these NLRs was also confirmed by CD-  
400 Search (<https://www.ncbi.nlm.nih.gov/Structure/cdd/wrpsb.cgi>).

401

#### 402 **Phylogenetic and neighbour network analyses**

403 We aligned the translated NB-ARC domains from the NLR-Annotator output with  
404 MUSCLE<sup>40</sup> using default parameters (v.3.8.31). We verified and manually curated the  
405 alignment with Jalview<sup>41</sup> (v2.10.1). We used Gblocks<sup>42</sup> (v0.91b) with the following  
406 parameters: Minimum Number Of Sequences For A Conserved Position: 9; Minimum  
407 Number Of Sequences For A Flanking Position: 14; Maximum Number Of Contiguous  
408 Nonconserved Positions: 8; Minimum Length Of A Block: 10; Allowed Gap Positions: None;

409 Use Similarity Matrices: Yes; to eliminate poorly aligned positions. This resulted in 36% of  
410 the original 156 positions being taken forward for the phylogeny. We built a Maximum  
411 Likelihood tree with the RAxML<sup>43</sup> program and the following parameters: raxmlHPC -f a -x  
412 12345 -p 12345 -N 1000 -m PROTCATJTT -s <input\_alignment.fasta> (MPI version  
413 v8.2.10). The best scoring tree with associated bootstrap values was visualised and mid-  
414 rooted with Dendroscope<sup>44</sup> (v3.5.9). There was clear separation between NLRs belonging to  
415 the two different clusters but the sub-clades had less support. One explanation would be that  
416 conflicting phylogenetic signals that are due to events such as hybridization, horizontal gene  
417 transfer, recombination, or gene duplication and loss might have occurred in the region. Split  
418 networks allow nodes that do not represent ancestral species and can thus represent such  
419 incompatible and ambiguous signals. We therefore used this method in the following part of  
420 the analysis to analyse the relationship between the BED domains.

421

422 We used the Neighbour-net method<sup>45</sup> implemented in SplitsTree4<sup>21</sup> (v4.16) to analyse the  
423 relationships between BED domains from NLR and non-NLR proteins. First we retrieved all  
424 BED-containing proteins from RefSeq v1.0 using the following steps: we used hmmer  
425 (v3.1b2, <http://hmmer.org/>) to identify conserved domains in protein sequences from RefSeq  
426 v1.0. We applied a cut-off of 0.01 on i-evalue to filter out any irrelevant identified domains.  
427 We separated the set between NLR and non-NLRs based on the presence of the NB-ARC and  
428 sequence homology for single BED proteins. BED domains were extracted from the  
429 corresponding protein sequences based on the hmmer output and were verified on the CD-  
430 search database. Alignments of the BED domains were performed in the same way as for  
431 NB-ARC domains and were used to generate a neighbour network in SplitsTree4 based on  
432 the uncorrected P distance matrix.

433

434 **Transcriptome analysis**

435 *Kronos analysis*

436 We reanalysed RNA-Seq data from cultivar Kronos<sup>46</sup> to determine whether the Kronos *Yr5*  
437 allele was expressed. We followed the same strategy as that described to define the *Yr7* and  
438 *Yr5* gene structures (candidate contig confirmation and gene annotation section). We  
439 generated a *de novo* assembly of the Kronos NLR repertoire from Kronos RenSeq data and  
440 used it as a reference when mapping read data from one replicate of the wild-type Kronos at  
441 heading stage. Read depths up to 30x were present for the *Yr5* allele which allowed  
442 confirmation of its expression. Likewise, the RNA-Seq reads confirmed the gene structure,  
443 which is similar to *YrSP*, and the premature termination codon in Kronos *Yr5*. Whether this  
444 allele confers resistance against PST remains to be elucidated.

445

446 *Re-analysis of RNA-Seq data in Dobon et al., 2016*

447 We used RNA-Seq data previously published by Dobon and colleagues<sup>18</sup>. Briefly, two RNA-  
448 Seq time-courses were used based on samples taken from leaves at 0, 1, 2, 3, 5, 7, 9, and 11  
449 dpi for the susceptible cultivar Vuka and 0, 1, 2, 3, and 5 dpi for the resistant AvocetS-*Yr5*<sup>23</sup>.  
450 We used normalised read counts (Transcript Per Million, TPM) from Ramirez-Gonzalez et al.  
451 2018 to produce the heatmap shown in Supplementary Figure 9 with the pheatmap R  
452 package<sup>47</sup> (v1.0.8). Transcripts were clustered according to their expression profile as defined  
453 by a Euclidean distance matrix and hierarchical clustering. Transcripts were considered  
454 expressed if their average TPM was  $\geq 0.5$  TPM in at least one time point. We used the  
455 DESeq2 R package<sup>48</sup> (v1.18.1) to conduct a differential expression analysis. We performed  
456 two comparisons: (1) we used a likelihood ratio test to compare the full model  $\sim$  Variety +  
457 Time + Variety:Time to the reduced model  $\sim$  Variety + Time to identify genes that were  
458 differentially expressed between the two varieties at a given time point after 0 dpi (workflow:

459 <https://www.bioconductor.org/help/workflows/rnaseqGene/>); (2) Investigation of both time  
460 courses in Vuka and AvocetS-Yr5 independently to generate all of the comparisons between  
461 0 dpi and any given time point, following the standard DESeq2 pipeline. Genes were  
462 considered as differentially expressed genes if they showed an adjusted p-value < 0.05 and a  
463 log2 fold change of 2 or higher. Most BED-containing proteins and BED-NLRs were not  
464 expressed in the analysed data. No pattern was observed for those that were expressed:  
465 differences were observed between varieties, but these were independent of the presence of  
466 the yellow rust pathogen.

467

## 468 **References**

- 469 1. Oerke, E. C. Crop losses to pests. *J. Agric. Sci.* **144**, 31–43 (2006).
- 470 2. Hubbard, A. *et al.* Field pathogenomics reveals the emergence of a diverse wheat  
471 yellow rust population. *Genome Biol.* **16**, 23 (2015).
- 472 3. Aravind, L. The BED finger, a novel DNA-binding domain in chromatin-boundary-  
473 element-binding proteins and transposases. *Trends Biochem. Sci.* **25**, 421–423 (2000).
- 474 4. Jones, J. D. G. & Dangl, J. L. The plant immune system. *Nature* **444**, 323–329 (2006).
- 475 5. Kourelis, J. & van der Hoorn, R. A. L. Defended to the nines: 25 years of resistance  
476 gene cloning identifies nine mechanisms for R protein function. *Plant Cell* (2018).  
477 doi:10.1105/tpc.17.00579
- 478 6. Sarris, P. F., Cevik, V., Dagdas, G., Jones, J. D. G. & Krasileva, K. V. Comparative  
479 analysis of plant immune receptor architectures uncovers host proteins likely targeted  
480 by pathogens. *BMC Biol.* **14**, 8 (2016).
- 481 7. Kroj, T., Chanclud, E., Michel-Romiti, C., Grand, X. & Morel, J.-B. Integration of  
482 decoy domains derived from protein targets of pathogen effectors into plant immune  
483 receptors is widespread. *New Phytol.* **210**, 618–626 (2016).
- 484 8. Bailey, P. C. *et al.* Dominant integration locus drives continuous diversification of  
485 plant immune receptors with exogenous domain fusions. *Genome Biol.* **19**, 23 (2018).
- 486 9. Bundock, P. & Hooykaas, P. An *Arabidopsis* hAT-like transposase is essential for  
487 plant development. *Nature* **436**, 282–284 (2005).
- 488 10. Yoshimura, S. *et al.* Expression of *Xa1*, a bacterial blight-resistance gene in rice, is  
489 induced by bacterial inoculation. *Proc. Natl. Acad. Sci. U. S. A.* **95**, 1663–1668 (1998).
- 490 11. Das, B., Sengupta, S., Prasad, M. & Ghose, T. Genetic diversity of the conserved  
491 motifs of six bacterial leaf blight resistance genes in a set of rice landraces. *BMC*  
492 *Genet.* **15**, 82 (2014).
- 493 12. Law, C. N. Genetic control of yellow rust resistance in *T. spelta album*. *Plant Breed.*  
494 *Institute, Cambridge, Annu. Rep.* **1975**, 108–109 (1976).

- 495 13. Johnson, R. & Dyck, P. L. Resistance to yellow rust in *Triticum spelta* var. *album* and  
496 bread wheat cultivars Thatcher and Lee. *Colloq. l'INRA* (1984).
- 497 14. Zhang, P., McIntosh, R. A., Hoxha, S. & Dong, C. M. Wheat stripe rust resistance  
498 genes *Yr5* and *Yr7* are allelic. *Theor. Appl. Genet.* **120**, 25–29 (2009).
- 499 15. Feng, J. Y. *et al.* Molecular mapping of *YrSP* and its relationship with other genes for  
500 stripe rust resistance in wheat chromosome 2BL. *Phytopathology* **105**, 1206–1213  
501 (2015).
- 502 16. Steuernagel, B. *et al.* Rapid cloning of disease-resistance genes in plants using  
503 mutagenesis and sequence capture. *Nat. Biotechnol.* **34**, 652–655 (2016).
- 504 17. Sun, Q., Wei, Y., Ni, Z., Xie, C. & Yang, T. Microsatellite marker for yellow rust  
505 resistance gene *Yr5* in wheat introgressed from spelt wheat. *Plant Breed.* **121**, 539–541  
506 (2002).
- 507 18. Yao, Z. J. *et al.* The molecular tagging of the yellow rust resistance gene *Yr7* in wheat  
508 transferred from differential host Lee using microsatellite markers. *Sci. Agric. Sin.* **39**,  
509 1146–1152 (2006).
- 510 19. Wingen, L. U. *et al.* Establishing the A. E. Watkins landrace cultivar collection as a  
511 resource for systematic gene discovery in bread wheat. *Theor. Appl. Genet.* **127**, 1831–  
512 1842 (2014).
- 513 20. Reeves, J. C. *et al.* Changes over time in the genetic diversity of four major European  
514 crops - a report from the Gediflux Framework 5 project. *Genet. Var. plant breeding.*  
515 *Proc. 17th EUCARPIA Gen. Congr. Tulln, Austria, 8-11 Sept. 2004* 3–7 (2004).
- 516 21. Huson, D. H. & Bryant, D. Application of phylogenetic networks in evolutionary  
517 studies. *Mol. Biol. Evol.* **23**, 254–267 (2006).
- 518 22. Ellis, J. G. Integrated decoys and effector traps: how to catch a plant pathogen. *BMC*  
519 *Biol.* **14**, 13 (2016).
- 520 23. Dobon, A., Bunting, D. C. E., Cabrera-Quio, L. E., Uauy, C. & Saunders, D. G. O. The  
521 host-pathogen interaction between wheat and yellow rust induces temporally  
522 coordinated waves of gene expression. *BMC Genomics* **17**, 380 (2016).
- 523 24. Germain, H. & Séguin, A. Innate immunity: has poplar made its BED? *New Phytol.*  
524 **189**, 678–687 (2011).
- 525 25. Seeholzer, S. *et al.* Diversity at the *Mla* powdery mildew resistance locus from  
526 cultivated barley reveals sites of positive selection. *Mol. Plant-Microbe Interact.* **23**,  
527 497–509 (2010).
- 528 26. Brunner, S. *et al.* Intragenic allele pyramiding combines different specificities of  
529 wheat *Pm3* resistance alleles. *Plant J.* **64**, 433–445 (2010).
- 530 27. Ellis, J. G., Lawrence, G. J., Luck, J. E. & Dodds, P. N. Identification of regions in  
531 alleles of the flax rust resistance gene *L* that determine differences in gene-for-gene  
532 specificity. *Plant Cell* **11**, 495–506 (1999).
- 533 28. Krasileva, K. V *et al.* Uncovering hidden variation in polyploid wheat. *Proc. Natl.*  
534 *Acad. Sci. U. S. A.* **6**, E913–E921 (2017).
- 535 29. Hubbard, A. J., Fanstone, V. & Bayles, R. A. *UKCPVS 2009 Annual report.*  
536 <https://cereals.ahdb.org.uk/media/1131303/Annual-Report-UKCPVS-2009.pdf>
- 537 30. Gassner, G. & Straib, W. *Die Bestimmung der biologischen Rassen des*

- 538 *Weizengelbrostes Puccinia glumarum* f.sp. tritici *Schmidt Erikss. u. Henn.* (1932).
- 539 31. McGrann, G. R. D. *et al.* Genomic and genetic analysis of the wheat race-specific  
540 yellow rust resistance gene *Yr5*. *J. Plant Sci. Mol. Breed.* **3**, (2014).
- 541 32. Lagudah, E. S., Appels, R., Brown, A. H. D. & McNeil, D. The molecular–genetic  
542 analysis of *Triticum tauschii*, the D-genome donor to hexaploid wheat. *Genome* **34**,  
543 375–386 (1991).
- 544 33. Bolger, A. M., Lohse, M. & Usadel, B. Trimmomatic: a flexible trimmer for Illumina  
545 sequence data. *Bioinformatics* **30**, 2114–2120 (2014).
- 546 34. Kim, D., Langmead, B. & Salzberg, S. L. HISAT: a fast spliced aligner with low  
547 memory requirements. *Nat. Methods* **12**, 357–360 (2015).
- 548 35. Thorvaldsdottir, H., Robinson, J. T. & Mesirov, J. P. Integrative Genomics Viewer  
549 (IGV): high-performance genomics data visualization and exploration. *Brief.*  
550 *Bioinform.* **14**, 178–192 (2013).
- 551 36. Pallotta, M. A. *et al.* Marker assisted wheat breeding in the southern region of  
552 Australia. in *Proceedings of 10th International Wheat Genet Symposium Instituto*  
553 *Sperimentale per la Cerealicoltura Rome* 789–791 (2003).
- 554 37. Ramirez-Gonzalez, R. H. *et al.* RNA-Seq bulked segregant analysis enables the  
555 identification of high-resolution genetic markers for breeding in hexaploid wheat.  
556 *Plant Biotechnol J* **13**, 613–624 (2015).
- 557 38. Broman, K. W., Wu, H., Sen, S. & Churchill, G. A. R/qrtl: QTL mapping in  
558 experimental crosses. *Bioinformatics* **19**, 889–890 (2003).
- 559 39. Shaw, P. D., Graham, M., Kennedy, J., Milne, I. & Marshall, D. F. Helium:  
560 visualization of large scale plant pedigrees. *BMC Bioinformatics* **15**, 259 (2014).
- 561 40. Edgar, R. C. MUSCLE: multiple sequence alignment with high accuracy and high  
562 throughput. *Nucleic Acids Res.* **32**, 1792–1797 (2004).
- 563 41. Waterhouse, A. M., Procter, J. B., Martin, D. M. A., Clamp, M. & Barton, G. J.  
564 Jalview Version 2--a multiple sequence alignment editor and analysis workbench.  
565 *Bioinformatics* **25**, 1189–1191 (2009).
- 566 42. Castresana, J. Selection of conserved blocks from multiple alignments for their use in  
567 phylogenetic analysis. *Mol. Biol. Evol.* **17**, 540–552 (2000).
- 568 43. Stamatakis, A. RAxML-VI-HPC: maximum likelihood-based phylogenetic analyses  
569 with thousands of taxa and mixed models. *Bioinformatics* **22**, 2688–2690 (2006).
- 570 44. Huson, D. H. & Scornavacca, C. Dendroscope 3: An interactive tool for rooted  
571 phylogenetic trees and networks. *Syst. Biol.* **61**, 1061–1067 (2012).
- 572 45. Bryant, D. & Moulton, V. Neighbor-Net: An agglomerative method for the  
573 construction of phylogenetic networks. *Mol. Biol. Evol.* **21**, 255–265 (2003).
- 574 46. Pearce, S. *et al.* Regulation of Zn and Fe transporters by the *GPC 1* gene during early  
575 wheat monocarpic senescence. *BMC Plant Biol.* **14**, 368 (2014).
- 576 47. Kolde, R. Pheatmap: pretty heatmaps. *R package version* (2015).
- 577 48. Love, M. I., Huber, W. & Anders, S. Moderated estimation of fold change and  
578 dispersion for RNA-seq data with DESeq2. *Genome Biol.* **15**, 550 (2014).
- 579 49. Jupe, F. *et al.* Identification and localisation of the NB-LRR gene family within the

- 580 potato genome. *BMC Genomics* **13**, 75 (2012).
- 581 50. Avni, R. *et al.* Wild emmer genome architecture and diversity elucidate wheat  
582 evolution and domestication. *Science*. **357**, 93–97 (2017).
- 583 51. Luo, M.-C. *et al.* Genome sequence of the progenitor of the wheat D genome *Aegilops*  
584 *tauschii*. *Nature* **551**, 498 (2017).
- 585

586 **Author contributions**

587 CM performed the experiments to clone *Yr7* and *Yr5* and the subsequent analyses of their loci  
588 and BED domains, designed the gene-specific markers, analysed the genotype data in the  
589 studied panels, and designed and made the figures. JZ performed the experiments to  
590 clone *YrSP*, confirm the *Yr7* and *Yr5* genes in *AvocetS-Yr7* and *AvocetS-Yr5* mutants, and  
591 identified the full length of *Yr5* and *YrSP* with their respective regulatory elements. CM and  
592 JZ developed the gene specific markers. PZ and RM performed the EMS treatment, isolation,  
593 and confirmation of *Yr5*, *Yr7*, and *YrSP* mutants in *AvocetS* NILs. PF performed the  
594 pathology work on the *Cadenza Yr7* mutants and the mapping populations. BS helped with  
595 the NLR annotator analysis and provided the bait library for target enrichment and  
596 sequencing of NLRs, NMA provided DNA samples for allelic variation studies and LB  
597 provided *Lemhi-Yr5* mutants. RM, EL, PZ, BW, SB, and CU conceived, designed, and  
598 supervised the research. CM and CU wrote the manuscript. JZ, PZ, RM, BW, NMA, LB and  
599 EL provided edits.

600

601 **Data availability**

602 All sequencing data has been deposited in the NCBI Short Reads Archive under accession  
603 numbers listed in Supplementary Table 12 (SRP139043). *Cadenza (Yr7)* and *Lemhi (Yr5)*  
604 mutants are available through the JIC Germplasm Resource Unit ([www.seedstor.ac.uk](http://www.seedstor.ac.uk)).

605

606 **Competing interests**

607 A patent application based on this work has been filed (United Kingdom Patent Application  
608 No. 1805865.1).



609 **Acknowledgements**

610 This work was supported by the UK Biotechnology and Biological Sciences Research  
611 Council Designing Future Wheat programme BB/P016855/1 and the Grains Research and  
612 Development Corporation, Australia. CM was funded by a PhD studentship from Group  
613 Limagrain and JZ is funded by PhD scholarships from the National Science Foundation  
614 (NSF) and the Monsanto Beachell-Borlaug International Scholars Programs (MBBISP). We  
615 thank the International Wheat Genome Sequencing Consortium for having providing us with  
616 pre-publication access to the RefSeq v1.0 assembly and gene annotation. We thank the John  
617 Innes Centre Horticultural Services and Limagrain Rothwell staff for management of the  
618 wheat populations. Also Sebastian Specel (Limagrain; Clermont-Ferrand) and Richard  
619 Goram (JIC) for their help in designing and running KASP assays. This research was  
620 supported by the NBI Computing Infrastructure for Science (CiS) group in Norwich, UK.

621 **Figure legends**

622 **Figure 1: *Yr5* and *YrSP* are allelic, but paralogous to *Yr7*.**

623 **a**, Left: Wild-type and selected EMS-derived susceptible mutant lines for *Yr7*, *Yr5*, and *YrSP*  
624 (Supplementary Table 2 and 3) inoculated with PST isolate 08/21 (*Yr7*), PST 150 E16 A+  
625 (*Yr5*), or PST 134 E16 A+ (*YrSP*). Right: Candidate gene structures, with mutations in red,  
626 and their predicted effects on the translated protein. **b**, Schematic representation of the  
627 physical interval of the *Yr* loci. The *Yr7*/*Yr5*/*YrSP* locus is shown in orange on chromosome  
628 2B with previously published SSR markers in black. Markers developed in this study to  
629 confirm the genetic linkage between the phenotype and the candidate contigs are shown as  
630 black lines underneath the chromosome. *Yr* loci mapping intervals are defined by the red  
631 horizontal lines. A more detailed genetic map is shown in Supplementary Figure 3.

632

633 **Figure 2: *Yr7* and *Yr5*/*YrSP* encode integrated BED-domain immune receptor genes.**

634 **a**, Schematic representation of the *Yr7*, *Yr5*, and *YrSP* protein domain organisation. BED  
635 domains are highlighted in red, NB-ARC domains are in blue, LRR motifs from NLR-  
636 Annotator are in dark green, and manually annotated LRR motifs (xxLxLxx) are in light  
637 green. Black triangles represent the EMS-induced mutations within the protein sequence. The  
638 plot shows the degree of amino acid conservation (50 amino acid rolling average) between  
639 *Yr7* and *Yr5* proteins, based on the conservation diagram produced by Jalview (2.10.1) from  
640 the protein alignment. Regions that correspond to the conserved domains have matching  
641 colours. The amino acid changes between *Yr5* and *YrSP* are annotated in black on the *YrSP*  
642 protein. **b**, Five *Yr5*/*YrSP* haplotypes were identified in this study. Polymorphisms are  
643 highlighted across the protein sequence with orange vertical bars for polymorphisms shared  
644 by at least two haplotypes and blue vertical bars for polymorphisms that are unique to the

645 corresponding haplotype. Matching colours across protein structures illustrate 100%  
646 sequence conservation.

647 **Figure 3: BED domains from BED-NLRs and non-NLR proteins are distinct.**

648 **a**, Numbers of NLRs in the syntenic regions across grass genomes (see Supplementary Figure  
649 6), including BED-NLRs. **b**, WebLogo (<http://weblogo.berkeley.edu/logo.cgi>) diagram  
650 showing that the BED-I and BED-II domains are distinct, with only the highly conserved  
651 residues that define the BED domain (red bars) being conserved between the two types. **c**,  
652 Gene structure most commonly observed for BED-NLRs and BED-BED-NLRs within the  
653 *Yr7/Yr5/YrSP* syntenic interval. **d**, Neighbour-net analysis based on uncorrected *P* distances  
654 obtained from alignment of 153 BED domains including the 108 BED-containing proteins  
655 (including 25 NLRs) from RefSeq v1.0, BED domains from NLRs located in the syntenic  
656 region as defined in Supplementary Figure 6, and BED domains from Xa1 and ZBED from  
657 rice. BED\_I and II clades are highlighted in purple and blue, respectively. BED domains  
658 from the syntenic regions not related to either of these types are in red. BED domains derived  
659 from non-NLR proteins are in black and BED domains from BED-NLRs outside the syntenic  
660 region are in grey. Seven BED domains from non-NLR proteins were close to BED domains  
661 from BED-NLRs. Supplementary Figure 8 includes individual labels.

662 **Supplementary Figure 1: Deployment of *Yr7* varieties in the field is correlated with an**  
663 **increase in the prevalence of PST isolates virulent on *Yr7* in the UK.**

664 Percentage of total harvested weight of wheat cultivar carrying *Yr7* (green) and the  
665 proportion of PST isolates that are virulent to *Yr7* (orange) from 1990 to 2016 in the United  
666 Kingdom. See Supplementary Table 1 for a summary of the data.

667

668 **Supplementary Figure 2: Identification of candidate contigs for the *Yr* loci using**  
669 **MutRenSeq.**

670 View of RenSeq reads from the wild-type and EMS-derived mutants mapped to the best  
671 candidate contigs identified with MutantHunter for the three genes targeted in this study.  
672 From top to bottom: vertical black lines represent the *Yr* loci, colored rectangles depict the  
673 motifs identified by NLR-Annotator (each motif is specific to a conserved NLR domain<sup>49</sup>),  
674 while read coverage (grey histograms) is indicated on the left, e.g. [0 - 149], and the line from  
675 which the reads are derived on the right, e.g. CadWT for Cadenza wild-type. Vertical bars  
676 represent the position of the SNPs identified between the reads and reference assembly – red  
677 shows C to T transitions and green G to A transitions. Black boxes highlight SNP for which  
678 the coverage was relatively low, but still higher than the 20x detection threshold. The top  
679 view shows the *Yr7* allele annotated from the Cadenza genome assembly before manual  
680 curation (Supplementary File 3). Vertical black lines illustrate the assembled candidate  
681 contigs and the one that was formerly *de novo* assembled from Cadenza RenSeq data, lacking  
682 the 5' region containing the BED domain and thus the Cad903 mutation. The middle view  
683 illustrates the *Yr5* locus annotated from the Lemhi-*Yr5* *de novo* assembly. The results are  
684 similar to those described above for *Yr7*. The full locus was *de novo* assembled. The bottom  
685 view illustrates the *YrSP* locus annotated from the AvocetS-*YrSP* *de novo* assembly with the  
686 four identified susceptible mutants all carrying a mutation in the candidate contig. The full  
687 locus was *de novo* assembled.

688

689 **Supplementary Figure 3: Candidate contigs identified by MutRenSeq are genetically**  
690 **linked to the *Yr* loci mapping interval.**

691 Schematic representation of chromosome 2B from Chinese Spring (RefSeq v1.0) with the  
692 positions of published markers linked to the *Yr* loci and surrounding closely linked markers  
693 that were used to define their physical position (orange rectangle). The chromosome is  
694 depicted as a close-up of the physical locus indicating the positions of KASP markers that  
695 were used for genetic mapping (horizontal bars, Supplementary Table 14). Blue colour refers

696 to *Yr7*, red to *Yr5*, and purple to *YrSP*. The black arrow points to the NLR cluster containing  
697 the best BLAST hits for *Yr7* and *Yr5/YrSP* on RefSeq v1.0. Coloured lines link the physical  
698 map to the corresponding genetic map for each targeted gene (see Methods). Genetic  
699 distances are expressed in centiMorgans (cM).

700

701 **Supplementary Figure 4: Pedigrees of selected Thatcher-derived varieties and their *Yr7***  
702 **allelic status.**

703 Pedigree tree of Thatcher-derived varieties where each circle represents a variety and the size  
704 of the circle is proportional to its prevalence in the tree. Colours illustrate the genotype with  
705 red showing the absence of *Yr7* and yellow its presence. Varieties in grey were not tested or  
706 are intermediate crosses. *Yr7* originated from *Triticum durum* cv. Iumillo and was  
707 introgressed into hexaploid wheat through Thatcher (indicated by arrow). Each *Yr7* positive  
708 variety is related to a parent that was also positive for *Yr7*. Figure was generated using the  
709 Helium software<sup>39</sup> (v1.17).

710

711 **Supplementary Figure 5: Diagnostic genetic marker for *Yr5*.**

712 The *Yr5*-specific insertion was used to generate a PCR amplification product of 1,281 bp for  
713 *Yr5* or a shorter amplicon for the absence of the insertion in *YrSP*, Claire, and Paragon (507  
714 bp). *Yr5* positive lines include the *Yr5* spelt donor and *Yr5* near-isogenic lines AvocetS-*Yr5*  
715 and Lemhi-*Yr5*. *YrSP* donor Spaldings Prolific and *YrSP* near-isogenic lines AvocetS-*YrSP*  
716 carry the shorter alternate allele, similar to the Claire, Cadenza and Paragon alleles identified  
717 in Figure 2. Negative controls include AvocetS and H<sub>2</sub>O. Size marker is shown on the left.

718

719 **Supplementary Figure 6: Expansion of BED-NLRs in the Triticeae and presence of**  
720 **conserved BED-BED-NLRs across the syntenic region.**

721 Schematic representation of the physical loci containing *Yr7* and *Yr5/YrSP* homologs on  
722 RefSeq v1.0 and its syntenic regions. The syntenic region is flanked by conserved non-NLR  
723 genes (orange arrows). Black arrows represent canonical NLRs and purple/blue/red arrows  
724 represent different types of BED-NLRs based on their BED domain and their relationship  
725 identified in Figure 3 and Supplementary Figure 7. Black lines represent phylogenetically  
726 related single NLRs located between the two NLR clusters illustrated in Supplementary  
727 Figure 8. Details of genes are reported in Supplementary File 4.

728

729 **Supplementary Figure 7: The *Yr* loci are phylogenetically related to nearby NLRs on**  
730 **RefSeq v1.0 and their orthologs.**

731 Phylogenetic tree based on translated NB-ARC domains from NLR-Annotator. Node labels  
732 represent bootstrap values for 1,000 replicates. The tree was rooted at mid-point and  
733 visualized with Dendroscope v3.5.9. The colour pattern matches that of Figure 3 to highlight  
734 BED-NLRs with different BED domains.

735

736 **Supplementary Figure 8: Neighbour-net analysis network as shown in Figure 3 with**  
737 **identifiers.**

738 Neighbour-net analysis based on uncorrected *P* distances obtained from alignment of 153  
739 BED domains including the 108 BED-containing proteins (including 25 NLRs) from RefSeq  
740 v1.0, BED domains from NLRs located in the syntenic region as defined in Supplementary  
741 Figure 6, and BED domains from Xa1 and ZBED from rice. BED\_I and II clades are  
742 highlighted in purple and blue, respectively. BED domains from the syntenic regions not  
743 related to either of these types are in red. BED domains derived from non-NLR proteins are  
744 in black and BED domains from BED-NLRs outside the syntenic region are in grey. Seven  
745 BED domains from non-NLR proteins were close to BED domains from BED-NLRs.

746

747 **Supplementary Figure 9: BED-NLRs and BED-containing proteins are not**  
748 **differentially expressed in yellow rust-infected susceptible and resistant varieties.**

749 Heatmap representing the normalised read counts (Transcript Per Million, TPM) from the  
750 reanalysis of published RNAseq data<sup>23</sup> for all the BED-containing proteins, BED-NLRs and  
751 canonical NLRs located in the syntenic region annotated on RefSeq v1.0. Lack of expression  
752 is shown in white and expression levels increase from blue to red. Asterisks show cases  
753 where several gene models were overlapping with NLR loci identified with NLR Annotator.  
754 The colour pattern matches that of Figure 3 to highlight BED-NLRs with different BED  
755 domains. Orange labels show the expression of the canonical NLRs located within the  
756 syntenic interval. The seven non-NLR BED genes whose BED domain clustered with the  
757 ones from BED-NLR proteins in Figure 3 and Supplementary Figure 8 are indicated by black  
758 triangles.

759

760 **Supplementary Table 1: Harvested weight of known *Yr7* varieties from 1990 to 2016**  
761 **and *virYr7* prevalence among UK PST isolates.**

762 Proportion of harvested *Yr7* wheat varieties in the UK from 1990 to 2016. The prevalence of  
763 yellow rust isolates virulent to *Yr7* across this time period is shown in the top row. Original  
764 data from NIAB-TAG Seedstats journal (NIAB-TAG Network) and the UK Cereal Pathogen  
765 Virulence Survey (<http://www.niab.com/pages/id/316/UKCPVS>).

766

767 **Supplementary Table 2: Plant materials analysed for the present study with the**  
768 **different PST isolates used for the pathology assays.**

769

770 **Supplementary Table 3: Plant material submitted for Resistance gene enrichment**  
771 **Sequencing (RenSeq).**

772 From left to right: Mutant line identifier, targeted gene, score when infected with PST  
773 according to the Grassner and Straib scale, mutation position, coverage of the mutation (at  
774 least 99% of the reads supported the mutant base in the mutant reads), predicted effect of the  
775 mutation on the protein sequence, comments. Lines with the same mutations are highlighted  
776 with matching colours.

777

778 **Supplementary Table 4: Genome assemblies used in the present study.**

779 Summary of the available genome assemblies<sup>50,51</sup> that were used for the *in silico* allele  
780 mining and synteny analysis across rice, *Brachypodium*, barley and different Triticeae  
781 accessions.

782

783 **Supplementary Table 5: *In silico* allele mining for *Yr7* and *Yr5/YrSP* in available**  
784 **genome assemblies for wheat.**

785 Table presents the percentage identity (% ID) of the identified alleles and matching colours  
786 illustrate identical haplotypes. Investigated genome assemblies are shown in Supplementary  
787 Table 4.

788

789 **Supplementary Table 6: Polymorphisms between *Yr5* protein and its identified alleles.**

790 Positions of the polymorphic amino acids across the five *Yr5/YrSP* proteins. Polymorphisms  
791 falling into the BED and NB-ARC domains are shown in red and blue, respectively.

792

793 **Supplementary Table 7: Presence/absence of *Yr7* alleles in a selected panel of Cadenza-**  
794 **derivatives and associated responses to different PST isolates (avirulent to *Yr7*: PST**  
795 **15/151 and 08/21; virulent to *Yr7*: 14/106).**

796 Infection types were grouped into two categories: 1 for resistant and 2 for susceptible. We  
797 used Vuka as a positive control for inoculation and absence of *Yr7*. The typical response of a  
798 *Yr7* carrier would thus be 1 – 1 – 2, although some varieties might carry other resistance  
799 genes that can lead to a 1 – 1 – 1 profile (e.g. Cadenza). Varieties that were positive for *Yr7*  
800 had either one or the other profile so none of them was susceptible to a PST isolate that is  
801 avirulent to *Yr7*. Few varieties (e.g Bennington, KWS-Kerrin, Brando) were susceptible to  
802 one of the two isolates avirulent to *Yr7* in addition to their susceptibility to the *Yr7*-virulent  
803 isolate. However, none of them carried the *Yr7* allele.

804

805 **Supplementary Table 8: Presence/absence of *Yr7* and *YrSP* in different wheat**  
806 **collections.** We used Vuka, AvocetS and Solstice as negative controls for the presence of *Yr7*  
807 and *YrSP* and AvocetS-*Yr* near-isogenic lines as controls for the corresponding *Yr* gene. We  
808 genotyped different collections: (i) a set of potential *Yr7* carriers based on literature research,  
809 (ii) a set of varieties that belonged to the UK AHDB Recommended List  
810 (<https://cereals.ahdb.org.uk/varieties/ahdb-recommended-lists.aspx>) between 2005 and 2018  
811 (labelled 2005-2018-UK\_RL), (iii) the Gediflux collection that includes modern European  
812 bread wheat varieties (1920-2010)<sup>20</sup>, (iv) a core set of the Watkins collection, which represent  
813 a set of global bread wheat landraces collected in the 1920-30s<sup>19</sup>. Most of the putative *Yr7*  
814 carriers were positive for all the *Yr7* markers apart from Aztec, Chablis and Cranbrook.  
815 Chablis was susceptible to the PST isolates that were avirulent to *Yr7* so it probably does not  
816 carry the gene. Regarding the 2005-2018-UK\_RL results were consistent across already  
817 tested varieties: Cadenza, Cordiale, Cubanita, Grafton and Skyfall were already positive in  
818 Supplementary Table 7. Energise, Freiston, Gallant, Oakley and Revelation were negative on  
819 both panels as well. Results were thus consistent across different sources of DNA. *Yr7*-  
820 containing varieties are not prevalent in the 2005-2018 Recommended List set, however, this  
821 gene is present in Skyfall, which is currently one of the most harvested varieties in the UK  
822 (Supplementary Table 1). We tested the *YrSP* marker on this set and it was positive only for  
823 AvocetS-*YrSP*. The frequency of *Yr7* was relatively low in the Gediflux panel (4%). This is  
824 consistent with results in Supplementary Table 1: *Yr7* deployment started in the UK in 1992  
825 with Cadenza and it was rarely used prior to that date. The same was observed in the subset  
826 of the Watkins collection (10%) where landraces that were positive for *Yr7* all originated  
827 from India and the Mediterranean basin. *Yr7* was introgressed into Thatcher (released in  
828 1936) from Iumillo, which originated from Spain and North-Africa (Genetic Resources  
829 Information System for Wheat and Triticum - <http://www.wheatpedigree.net/>). Iumillo is likely



830 to be pre-1920s and these landraces are all bread wheats so they might have inherited it from  
831 another source. However, there is no evidence for *Yr7* coming from another source than  
832 Iumillo in the modern bread wheat varieties.

833 **Supplementary Table 9: Presence/absence of *Yr5* alleles in a subset of previously studied**  
834 **collections.**

835 A subset of the aforementioned collection was investigated for the *Yr5* presence. “Yes” in the  
836 *Yr5* column refers to amplification of the 1,281 bp amplicon with the *Yr5*-Insertion primers  
837 (Supplementary Figure 5). “Yes” in the *Yr5* alternate alleles column refers to the  
838 amplification of the 507 bp amplicon that was identified for AvocetS-*YrSP*, Claire, Cadenza  
839 and Paragon in Supplementary Figure 8. “Yes” in the no amplification column refers to  
840 identification of a profile similar to the one found for AvocetS in Supplementary Figure 5.

841

842 **Supplementary Table 10: Identified BED-containing proteins in RefSeq v1.0 based on a**  
843 **hmmer scan analysis (see Methods).**

844 Several features are added: number of identified BED domains and the presence of other  
845 conserved domains present, the best BLAST hit from the non-redundant database of NCBI  
846 with its description and score, and whether the BED domain was related to BED domains  
847 from NLR proteins based on the neighbour network shown in Supplementary Figure 7.

848

849 **Supplementary Table 11: Transcripts per Million-normalised read counts from the re-**  
850 **analysis of published RNA-Seq data<sup>23</sup> and associated differential expression analysis**  
851 **performed with DESeq2.**

852

853 **Supplementary Table 12: Sequencing details of RenSeq data generated in this study.**

854

855 **Supplementary Table 13: *De novo* assemblies generated from the corresponding**  
856 **RenSeq data.**

857

858 **Supplementary Table 14: Primers designed to map and clone *Yr7*, *Yr5*, and *YrSP*.**

859 Note that KASP assays require the addition of the corresponding 5' -tails for the two KASP  
860 primers

861

862 **Supplementary Table 15: Diagnostic markers for *Yr5*, *Yr7*, and *YrSP*.**

863 Note that KASP assays require the addition of the corresponding 5' -tails for the two KASP  
864 primers.

865

866 **Supplementary Table 16: Passport data of tested *T. dicoccoides* accessions**

867 **Supplementary File 1:** Annotation of the *Yr7* locus in Cadenza with exon/intron structure,  
868 positions of mutations and the position of primers for long-range PCR and nested PCRs that  
869 were carried out prior to Sanger sequencing (Supplementary Table 14). The file also includes  
870 the derived CDS and protein sequences with annotated conserved domains. Amino acids  
871 encoding the BED domain are shown in red and those encoding the NB-ARC domain are in  
872 blue. LRR repeats identified with NLR Annotator are highlighted in dark green and manually  
873 annotated LRR motifs xxLxLxx are underlined and in bold black.

874

875 **Supplementary File 2:** Annotation of the *Yr5/YrSP* locus in Lemhi-*Yr5* and AvocetS-*YrSP*,  
876 respectively, with exon/intron structure, the position of mutations and the position of primers  
877 for long-range PCR and nested PCRs that were carried out prior to Sanger sequencing  
878 (Supplementary Table 14). The derived CDS and protein sequences with annotated conserved  
879 domains are also shown. Amino acids encoding the BED domain are shown in red and those  
880 encoding the NB-ARC domain are in blue. LRR repeats identified with NLR Annotator are  
881 highlighted in dark green and manually annotated LRR motifs xxLxLxx are underlined and in  
882 bold black. Design of the *Yr5* PCR marker is shown at the end of the file with the insertion  
883 that is specific to *Yr5* when compared to *YrSP* and Claire.

884

885 **Supplementary File 3: Curation of the *Yr7* locus in the Cadenza genome assembly based  
886 on Sanger sequencing results.**

887 Comments show the position of the unknown bases (“N”) in the “Yr7\_with\_Ns” sequence.  
888 Curation based on Sanger sequencing data is shown in bold black in the “curated\_Yr7”  
889 sequence with the 39 bp insertion and 129 bp deletion. Allele mining for *Yr7* in the Paragon  
890 assembly showed that a similar assembly issue might have occurred for this cultivar (same  
891 annotation in the “Yr7\_Paragon\_with\_Ns” sequence). This is consistent with the fact that  
892 both assemblies were produced with the same pipeline (Supplementary Table 4). We used  
893 RenSeq data available for Paragon and performed an alignment as described for the  
894 MutRenSeq pipeline against Cadenza NLRs with the curated *Yr7* loci included. A screen  
895 capture of the mapping is shown. Only one SNP was identified (75% Cadenza, 25%  
896 Paragon). Across the six reads supporting the alternate base, four displayed several SNPs and

897 mapped to an additional Cadenza NLR. This provides evidence for the presence of the  
898 identical gene in Paragon which is supported by phenotypic data.

899

900 **Supplementary File 4:** Syntenic region across different grasses (Supplementary Table 4) and  
901 the NLR loci identified with NLR-Annotator. See Methods for a detailed explanation of the  
902 analysis and Supplementary Figure 6 for an illustration.

903

904 **Supplementary File 5:** Curated sequences of BED-NLRs from chromosome 2B and  
905 Ta\_2D7. Exons are highlighted with different colours (yellow, green, blue, pink). Amino  
906 acids encoding the BED domain are shown in red and those encoding the NB-ARC domain  
907 are in blue. LRR repeats identified with NLR Annotator are highlighted in dark green and  
908 manually annotated LRR motifs xxLxLxx are underlined and in bold black.

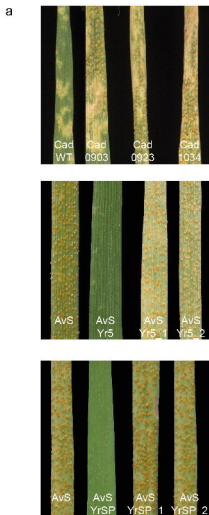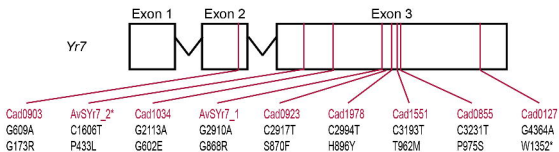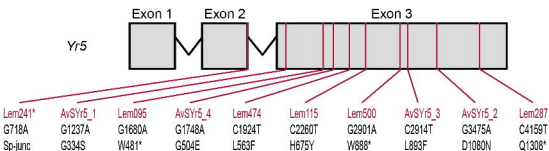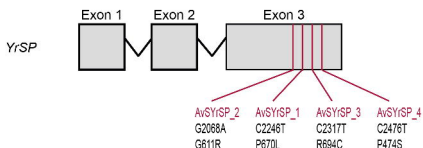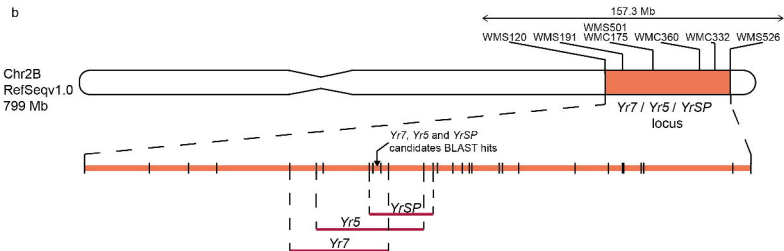

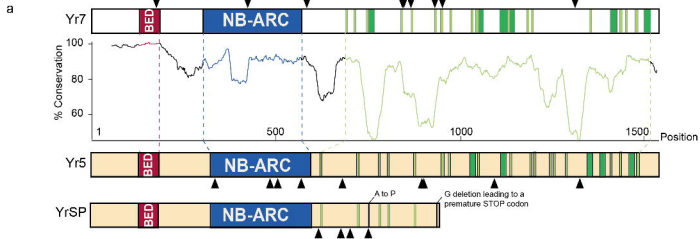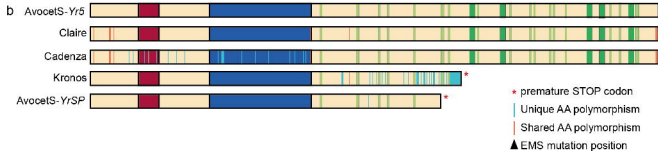

**a**

| Syntenic interval            | #NLRs | #BED | #BED   | #BED    | #BED      |
|------------------------------|-------|------|--------|---------|-----------|
|                              |       | NLRs | NLRs-I | NLRs-II | NLRs-I-II |
| Rice                         | 6     | 2    | -      | -       | -         |
| Brachypodium                 | 4     | 4    | 1      | 1       | -         |
| Barley                       | 2     | -    | -      | -       | -         |
| <i>Aegilops tauschii</i> (D) | 8     | 4    | 1      | 1       | 1         |
| Hexaploid wheat (D)          | 6     | 2    | 1      | -       | 1         |
| Tetraploid wheat (A)         | 8     | 1    | 1      | -       | -         |
| Hexaploid wheat (A)          | 12    | 5    | 3      | 2       | -         |
| Tetraploid wheat (B)         | 20    | 10   | 6      | 2       | 1         |
| Hexaploid wheat (B)          | 13    | 5    | 1      | 1       | 3         |

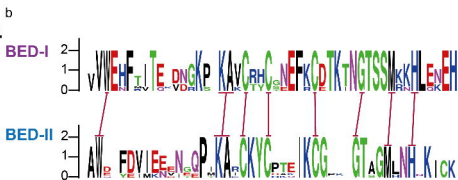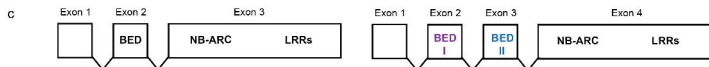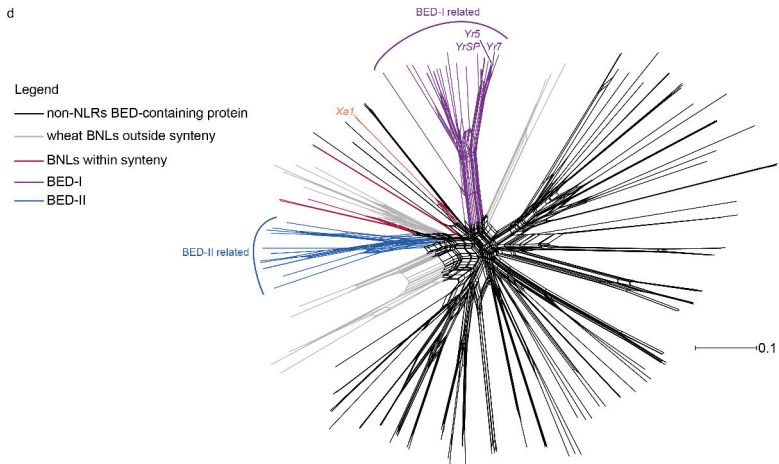

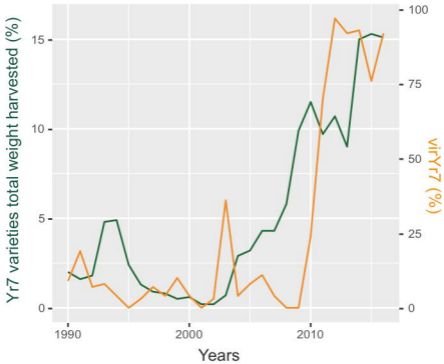

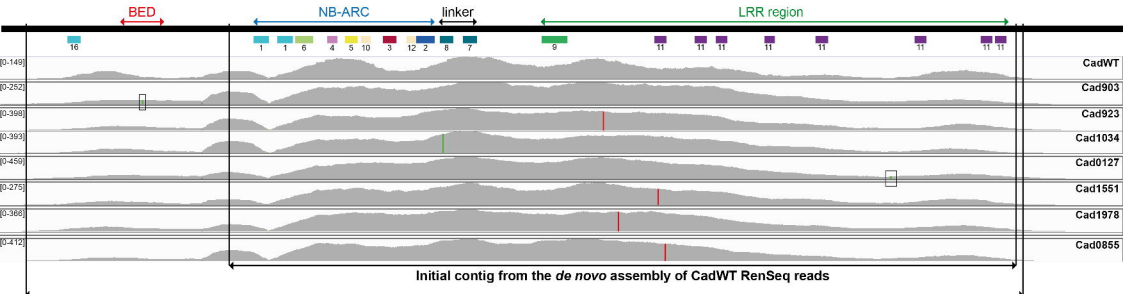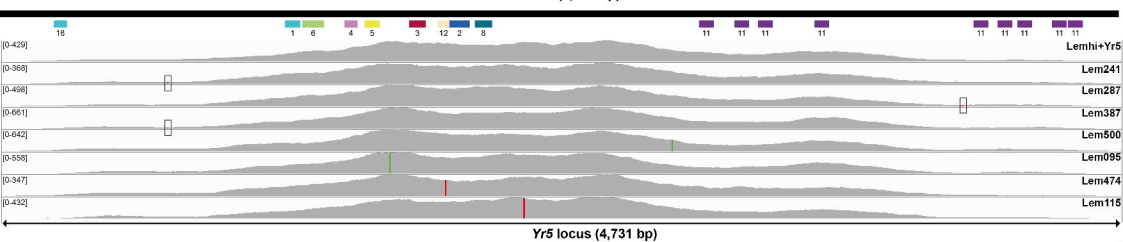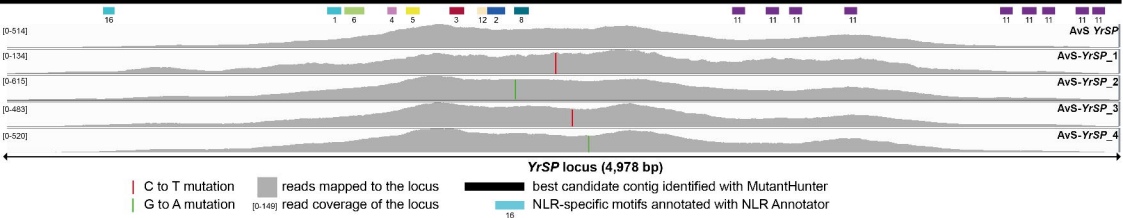



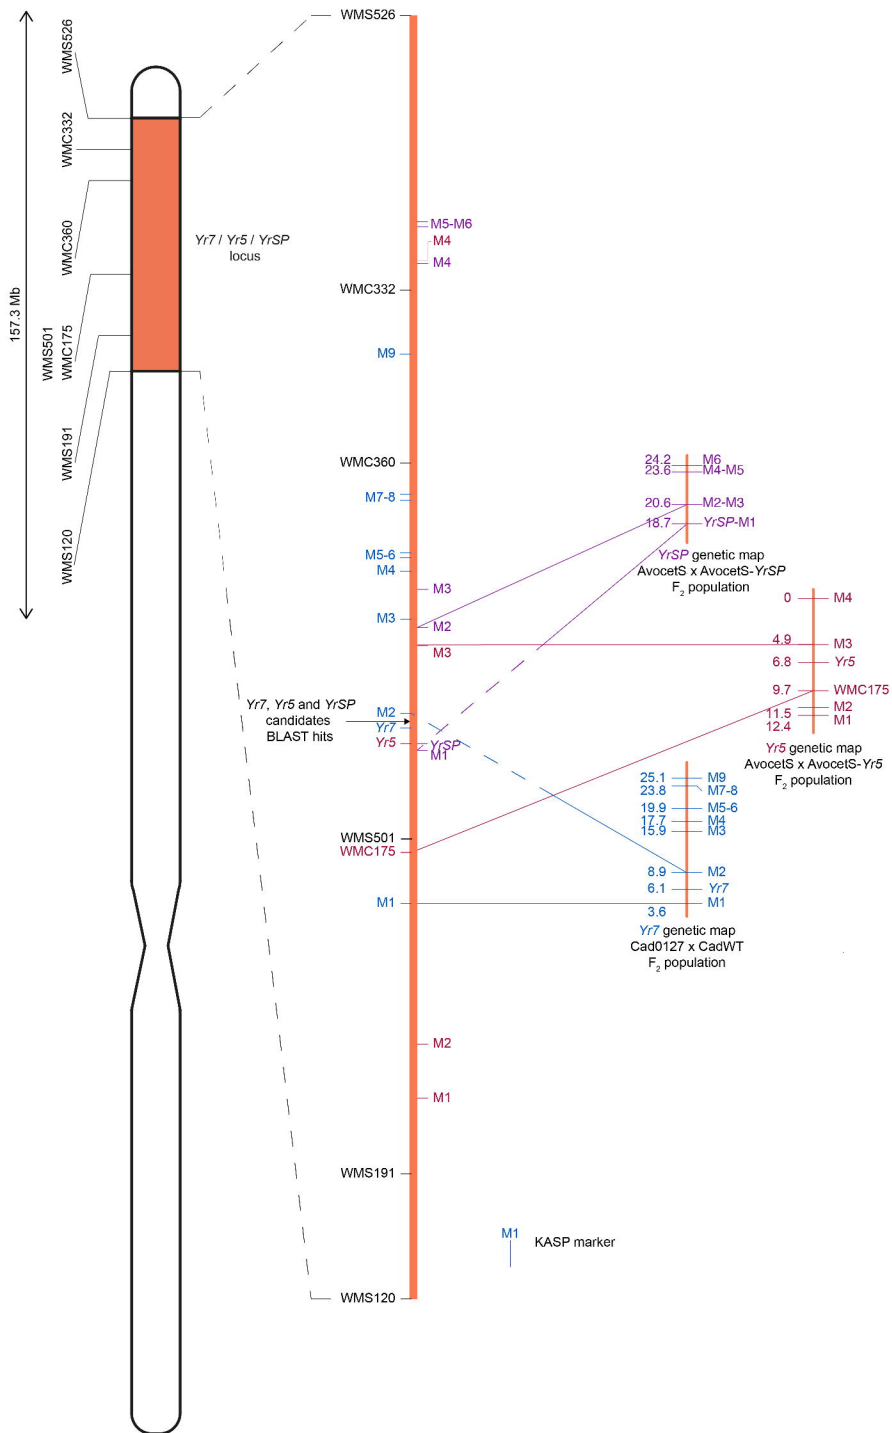

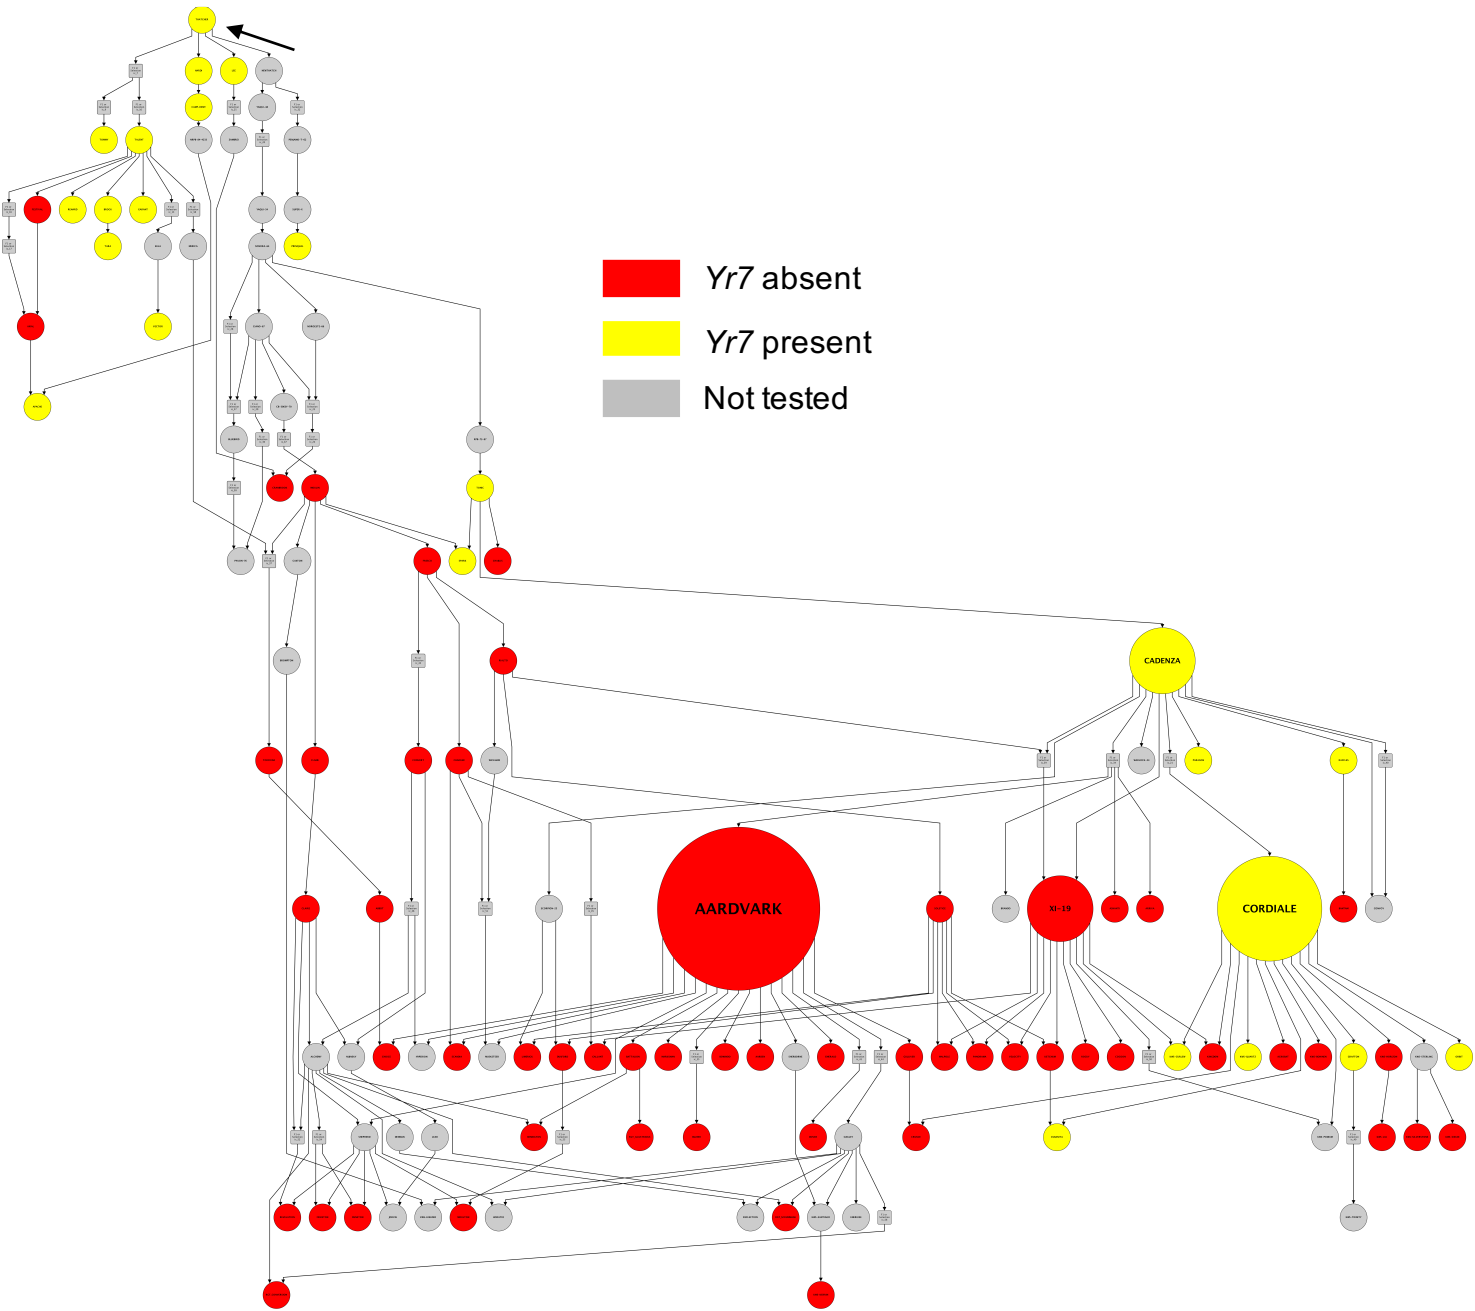

3,000 bp →

1,500 bp →

1,200 bp →

1,000 bp →

500 bp →

Spelt

AvocetS  
+Yr5

Spaldings  
Prolific

AvocetS  
+YrSP

Claire

Cadenza

Paragon

AvocetS

AvocetS  
+Yr7

Water

Lemhi  
+Yr5

Lemhi  
+Yr5

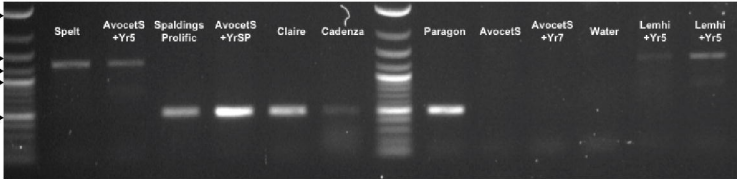

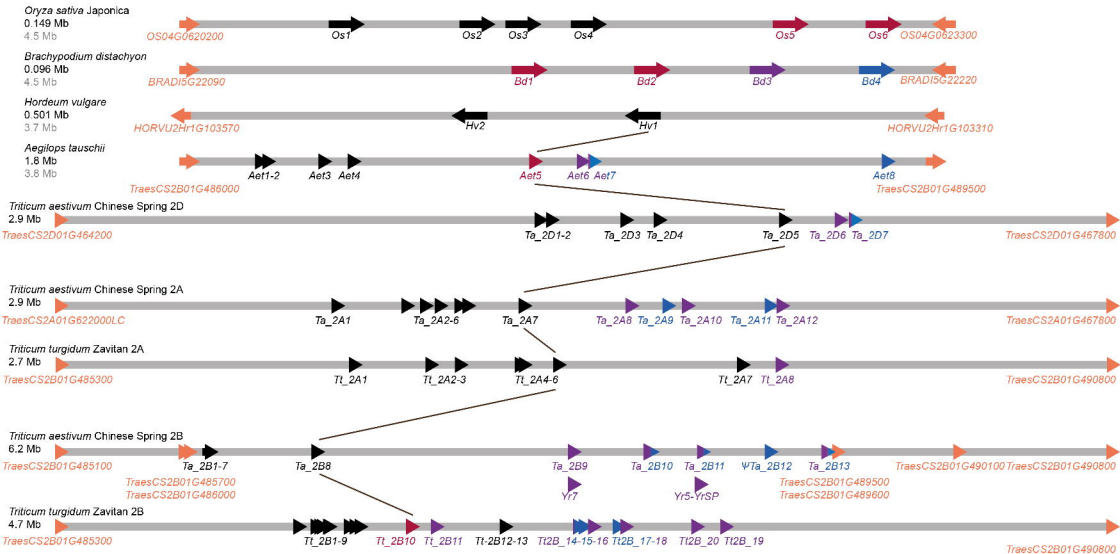

▶ non-NLR     ▶ BED-NLR     ▶ NLR     — Phylogenetically related NLRs separating the two major clusters  
▶ BED-I-NLR     ▶ BED-II-NLR     ▶ BED-I-II-NLR

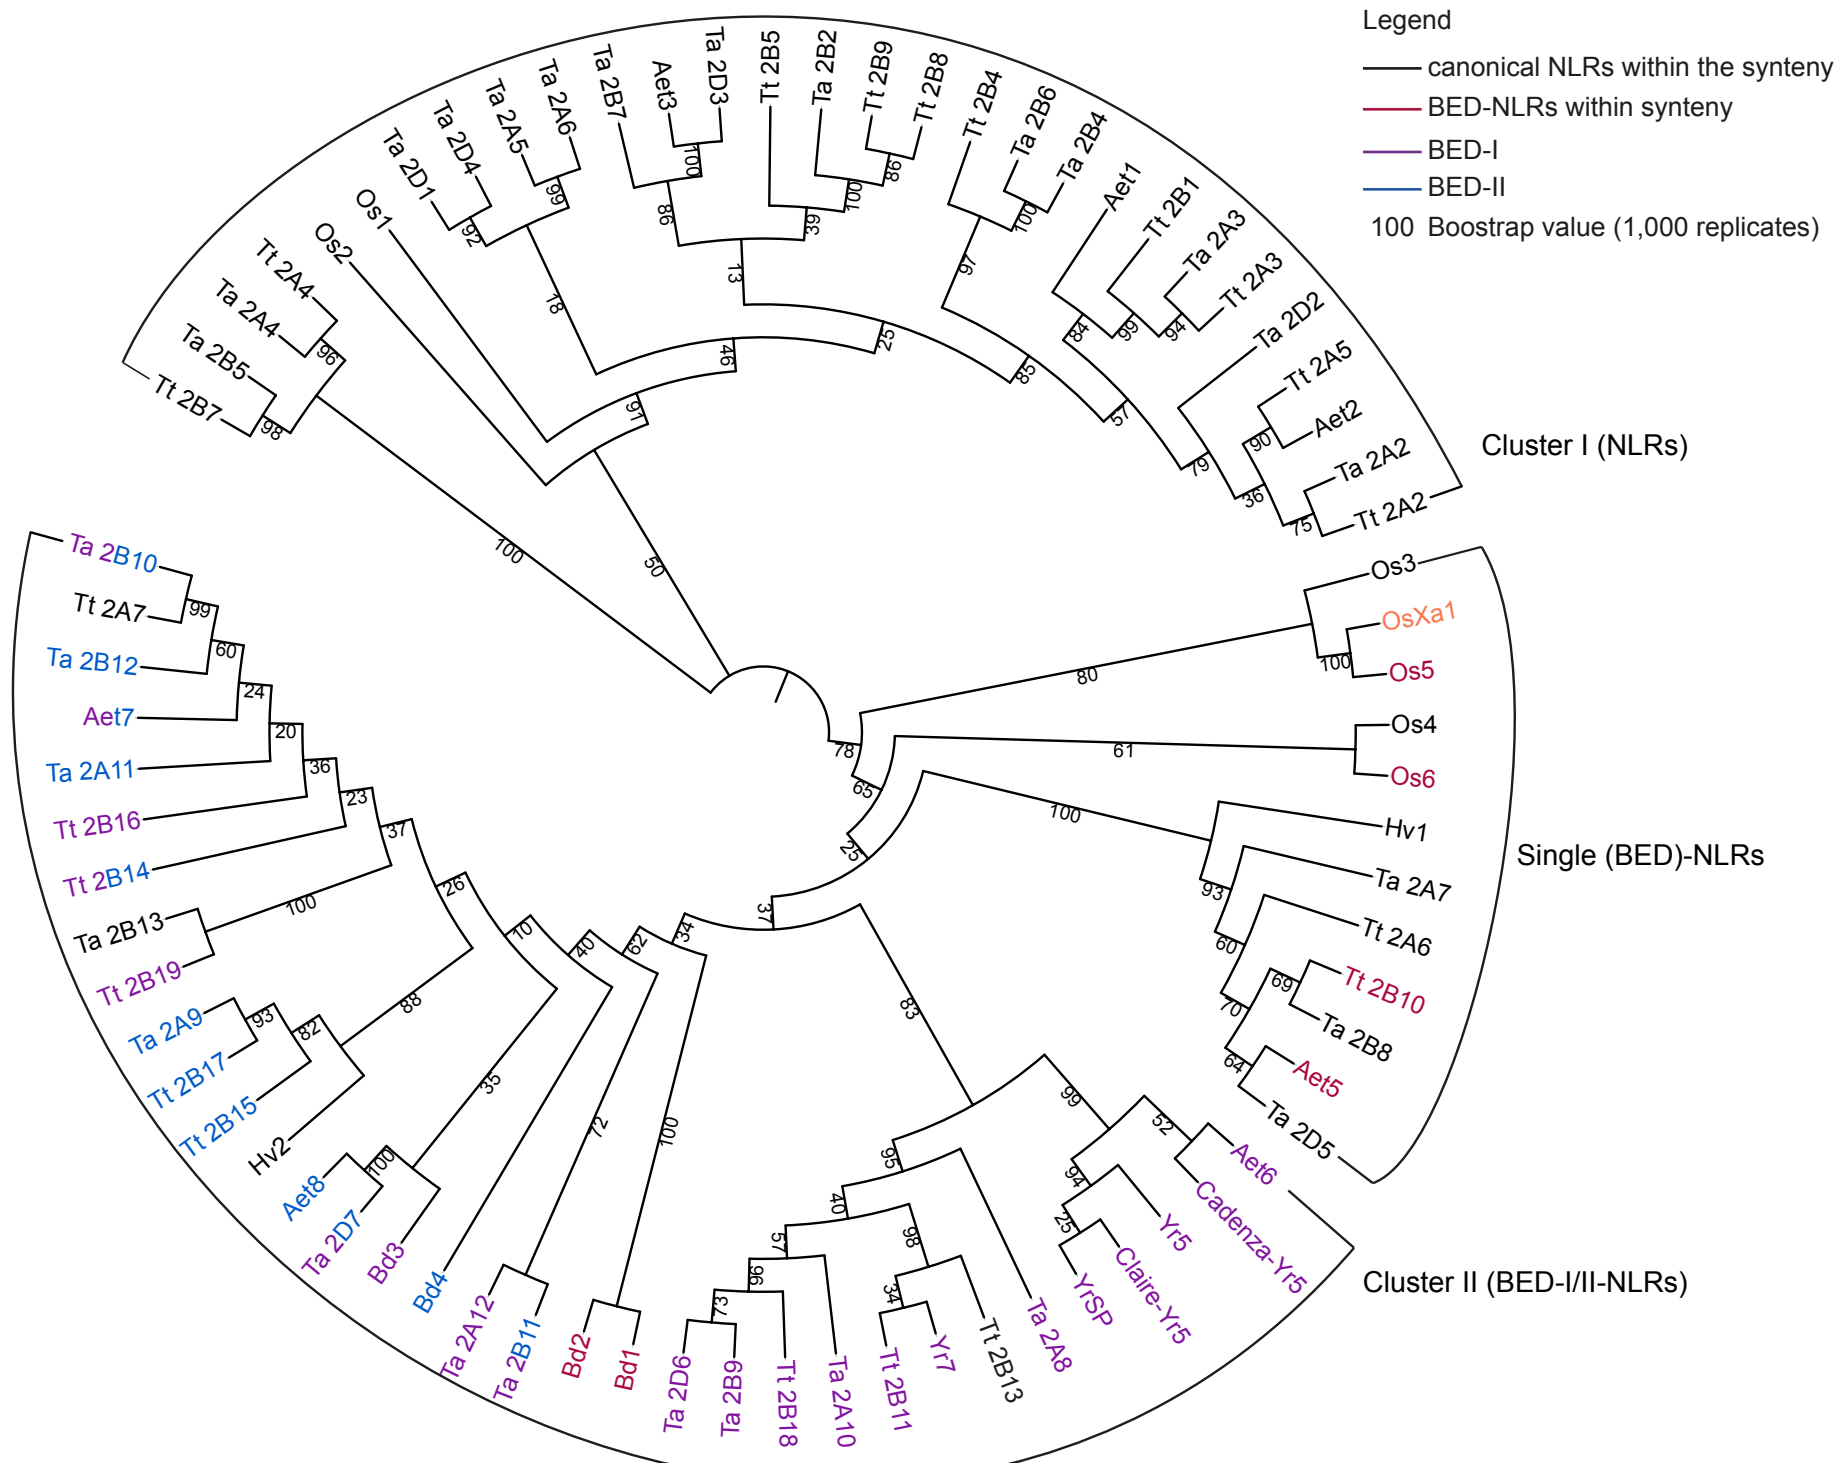

Legend

- canonical NLRs within the synteny
- BED-NLRs within synteny
- BED-I
- BED-II
- 100 Bootstrap value (1,000 replicates)

Cluster I (NLRs)

Single (BED)-NLRs

Cluster II (BED-I/II-NLRs)

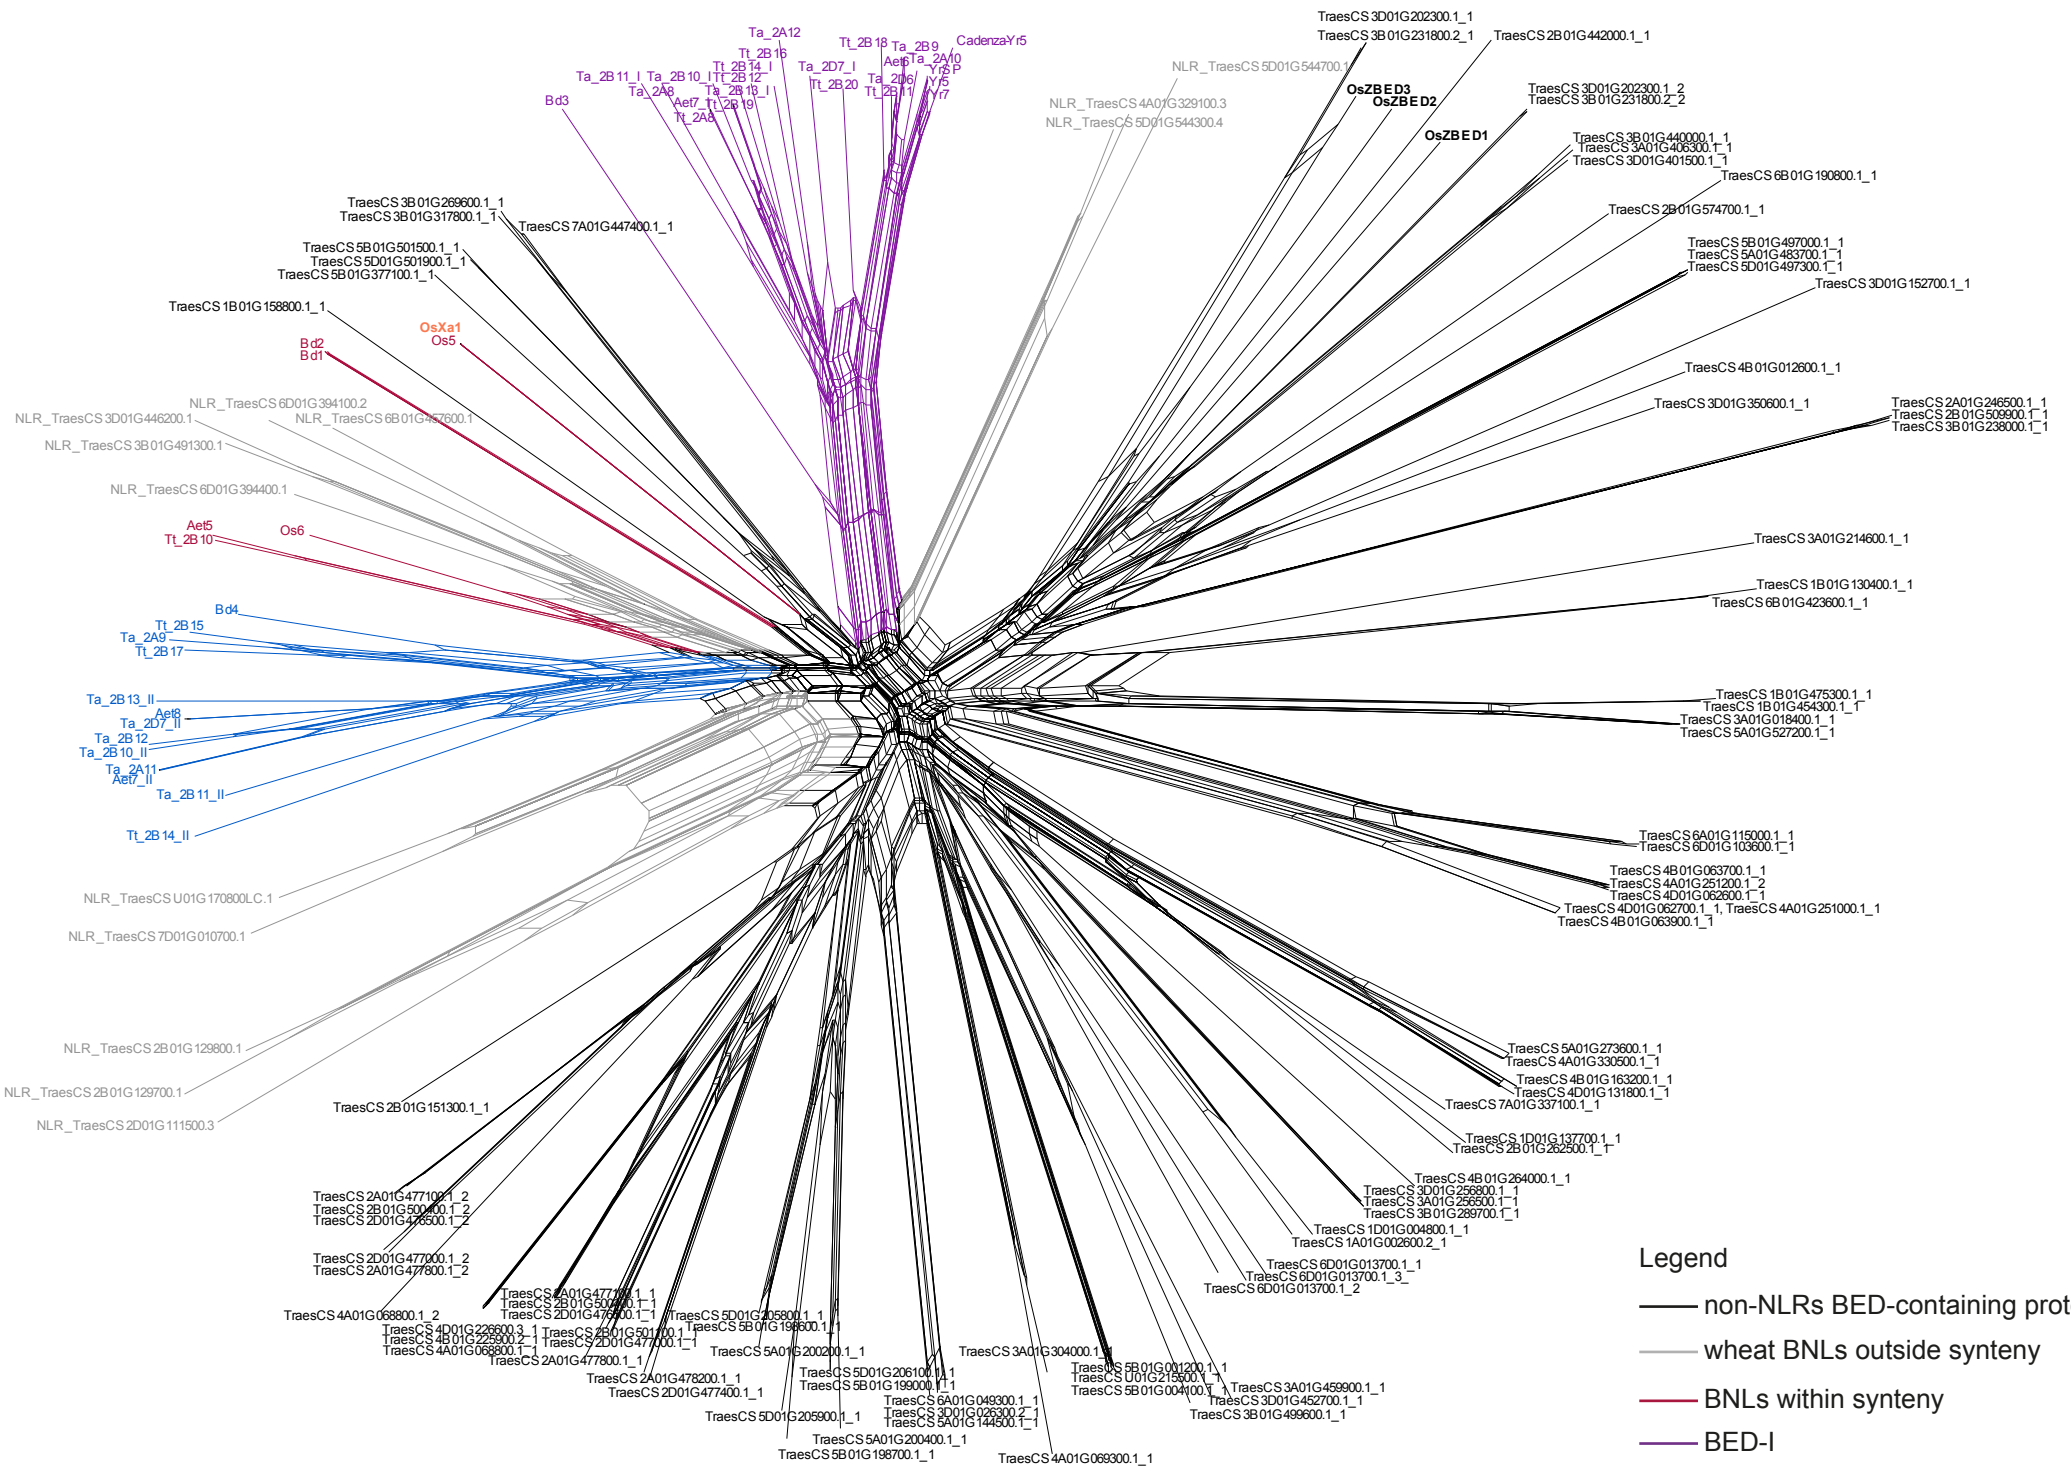

- Legend**
- non-NLRs BED-containing protein
  - wheat BNLs outside synteny
  - BNLs within synteny
  - BED-I
  - BED-II

0.1

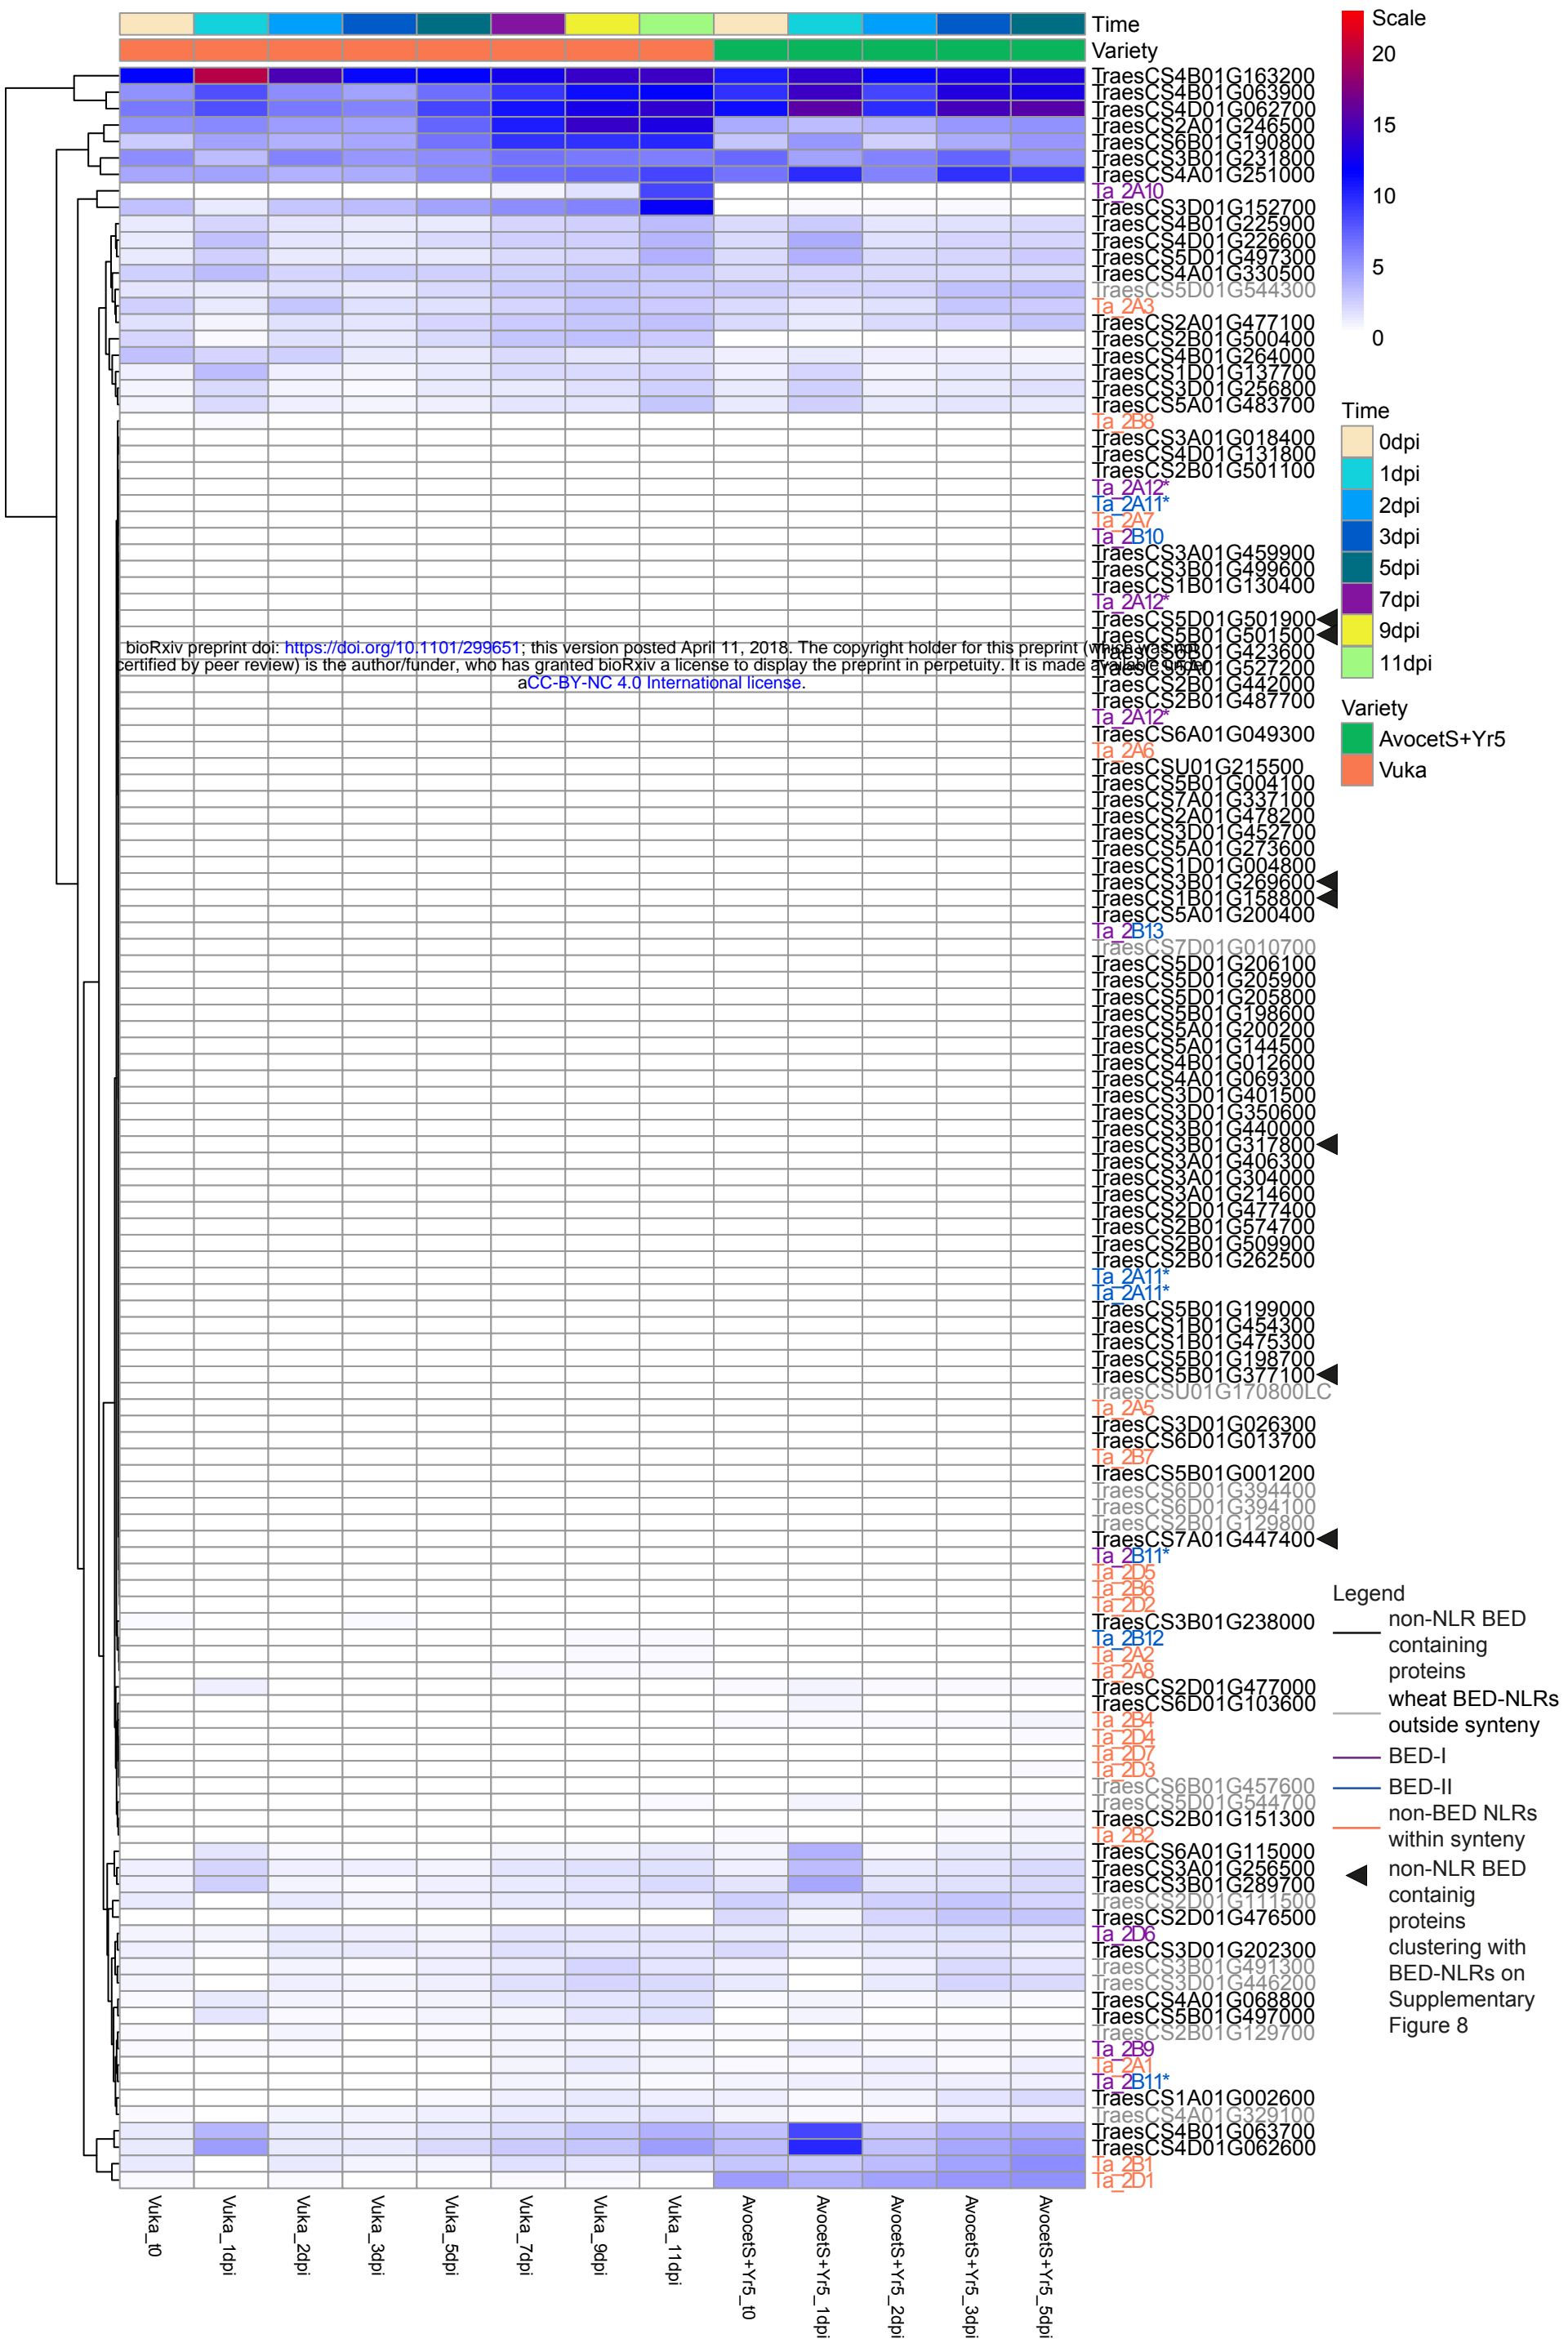

Source: https://www.biorxiv.org/content/10.1101/299651v1.full.pdf
